# Supplementary material
Source: PubMed Central journal article supplement (PMC2872072)

## Supporting Information

### **Chemoenzymatic synthesis of Amaryllidaceae constituents and biological evaluation of their C-1 analogs. The next generation synthesis of 7-deoxypancratistatin and dihydrolycoricidine.**

Jonathan Collins, Uwe Rinner, Michael Moser, Tomas Hudlicky\*, Ion Ghiviriga, Anntherese E. Romero, Alexander Kornienko, Dennis Ma, Carly Griffin and Siyaram Pandey

*Department of Chemistry and Centre for Biotechnology, Brock University,  
500 Glenridge Ave., St. Catharines, ON, L2S 3A1, Canada  
[thudlicky@brocku.ca](mailto:thudlicky@brocku.ca)*

### **Contents of supporting information**

| <b>Contents</b>                     | <b>Page Number</b> |
|-------------------------------------|--------------------|
| <b>General Experimental Section</b> | 2                  |
| Spectral data                       | 3                  |
| Compound <b>25b</b>                 | 3                  |
| Compound <b>25a</b>                 | 4                  |
| Compound <b>27</b>                  | 5                  |
| Compound <b>20</b>                  | 6                  |
| Compound <b>28</b>                  | 7                  |
| Compound <b>21</b>                  | 8                  |
| Compound <b>30</b>                  | 9                  |
| Compound <b>22</b>                  | 10                 |
| Compound <b>34</b>                  | 11                 |
| Compound <b>35</b>                  | 12                 |
| Compound <b>39</b>                  | 13                 |
| Compound <b>40</b>                  | 14                 |
| Compound <b>41</b>                  | 15                 |
| Compound <b>42</b>                  | 16                 |
| Compound <b>44</b>                  | 17                 |
| Compound <b>45</b>                  | 18                 |
| Compound <b>46</b>                  | 19                 |
| Compound <b>48</b>                  | 20                 |
| Compound <b>7</b>                   | 21                 |
| Compound <b>49</b>                  | 22                 |
| Compound <b>50</b>                  | 23                 |

## General Experimental Details

All non-hydrolytic reactions were carried out under an argon atmosphere. Glassware used for moisture-sensitive reactions was flame-dried under vacuum and subsequently purged with argon. THF, DME, and toluene were distilled from potassium/benzophenone. Methylene chloride and acetonitrile were distilled from calcium hydride. Flash column chromatography was performed using Kieselgel 60 (230-400 mesh). Analytical thin-layer chromatography was performed using silica gel 60-F<sub>254</sub> plates. Melting points are reported uncorrected. IR spectra were recorded as neat samples or in KBr pellets. <sup>1</sup>H and <sup>13</sup>C NMR spectra were obtained on either a 300-MHz or 600 MHz instrument. Data are reported as (s = singlet, d = doublet, t = triplet, q = quartet, m = multiplet, br = broad; coupling constants(s) in Hz, integration. Specific rotation measurements are given in deg cm<sup>3</sup> g<sup>-1</sup> dm<sup>-1</sup>. Mass spectra and high resolution mass spectra were performed by the analytical division at Brock University

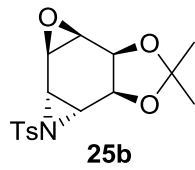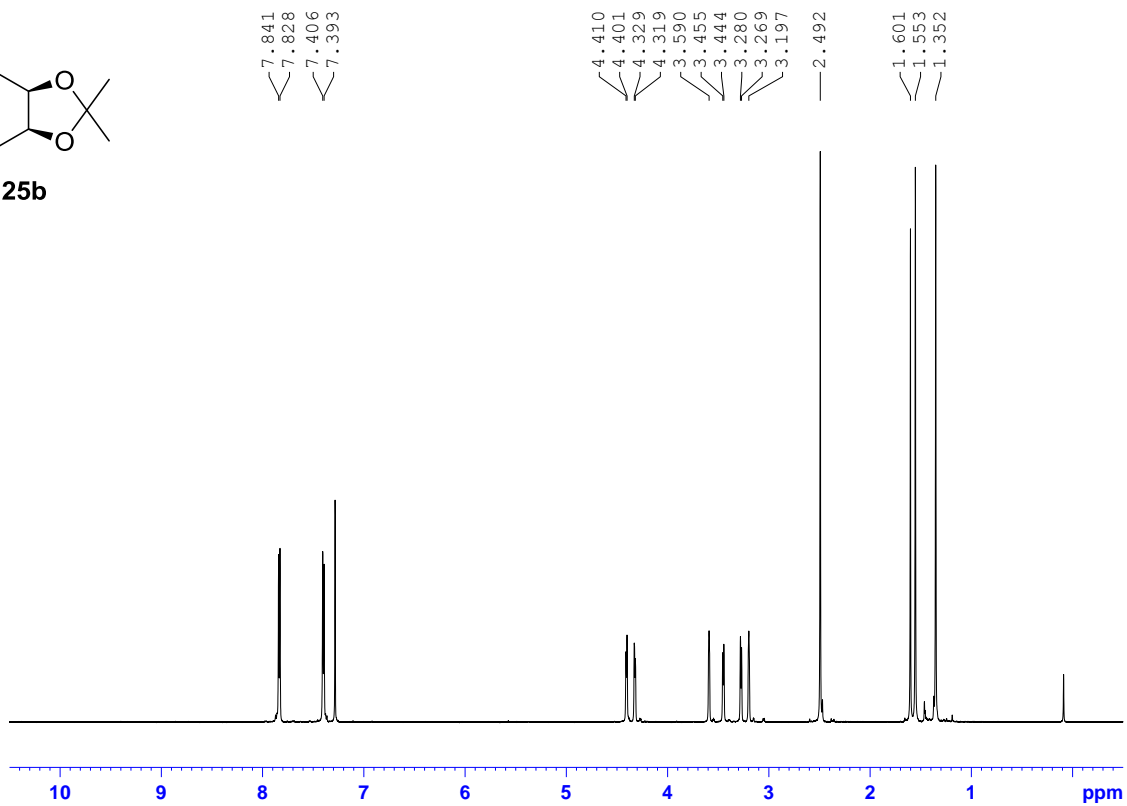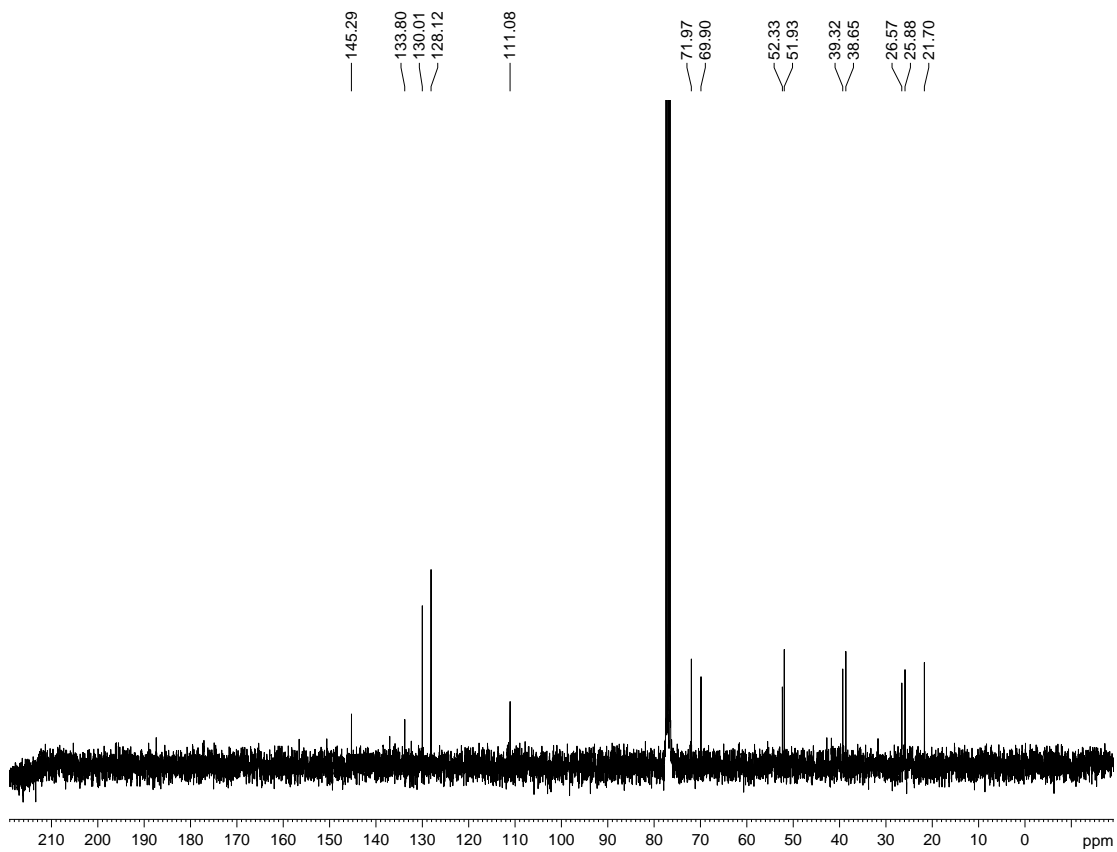

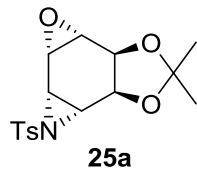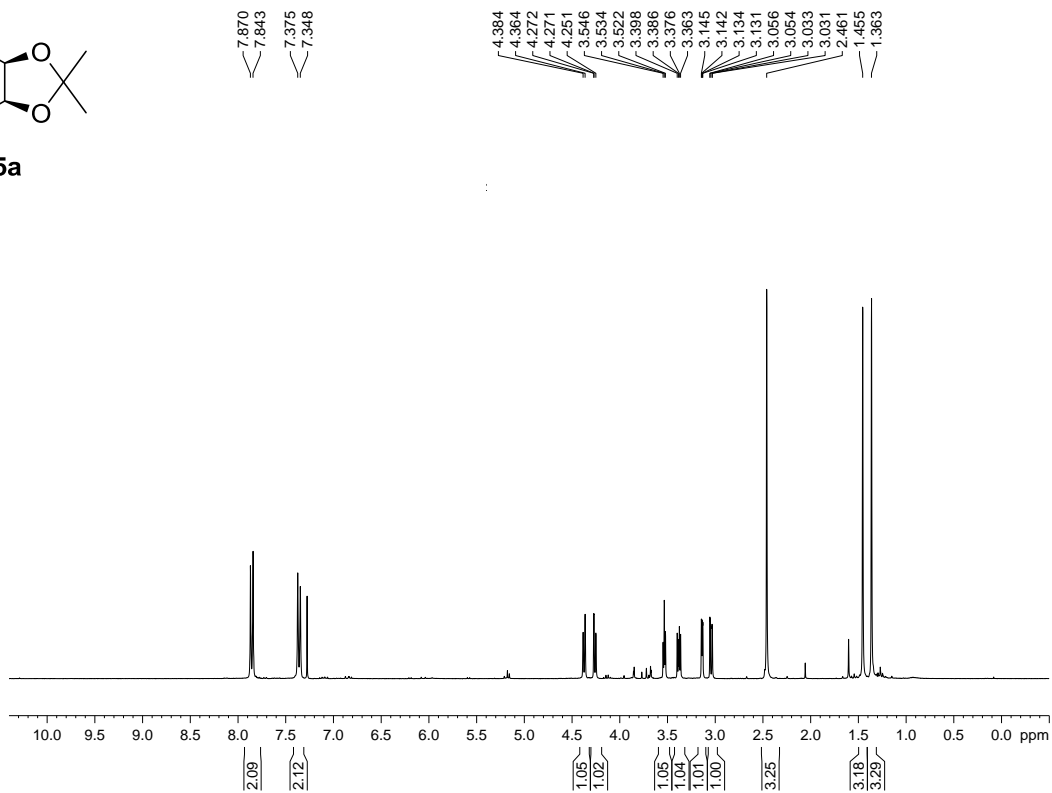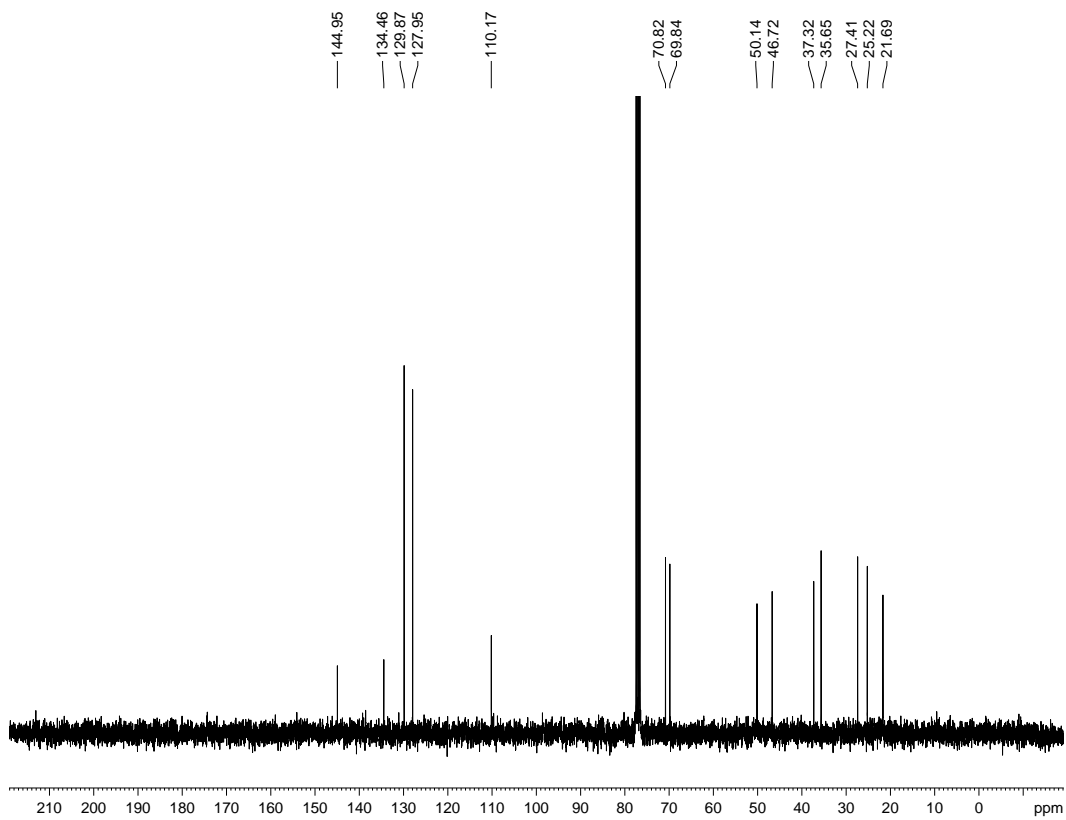

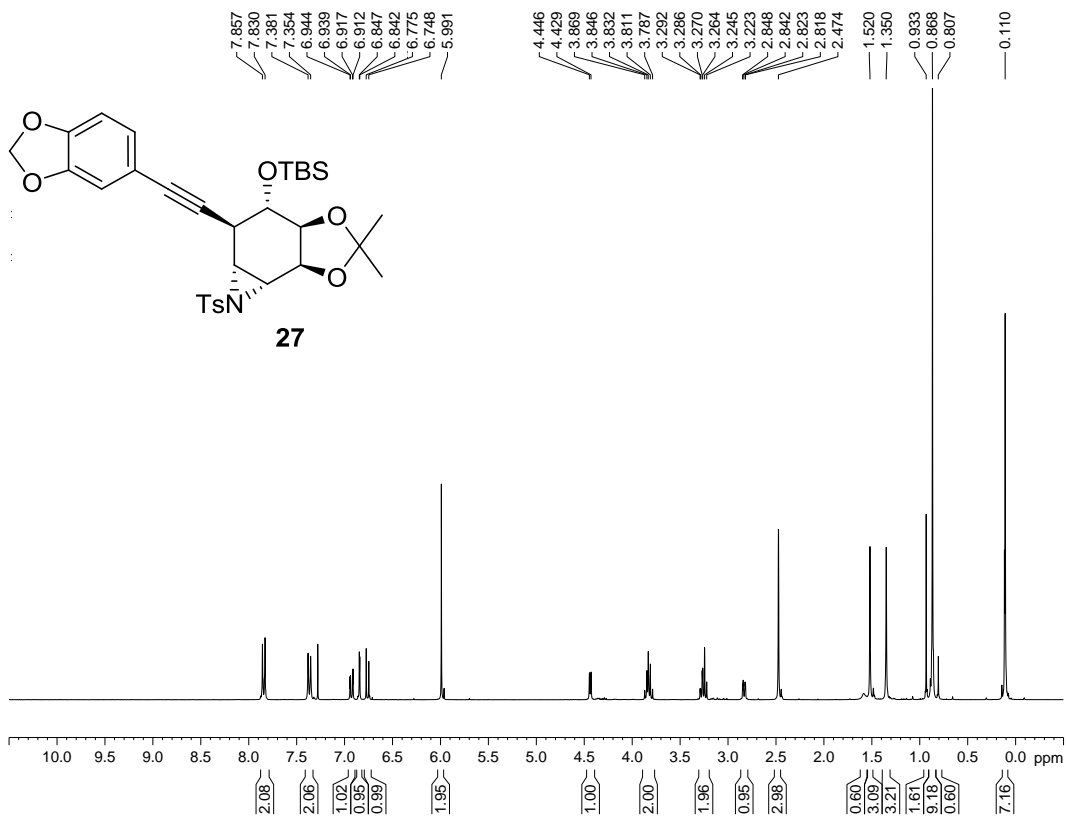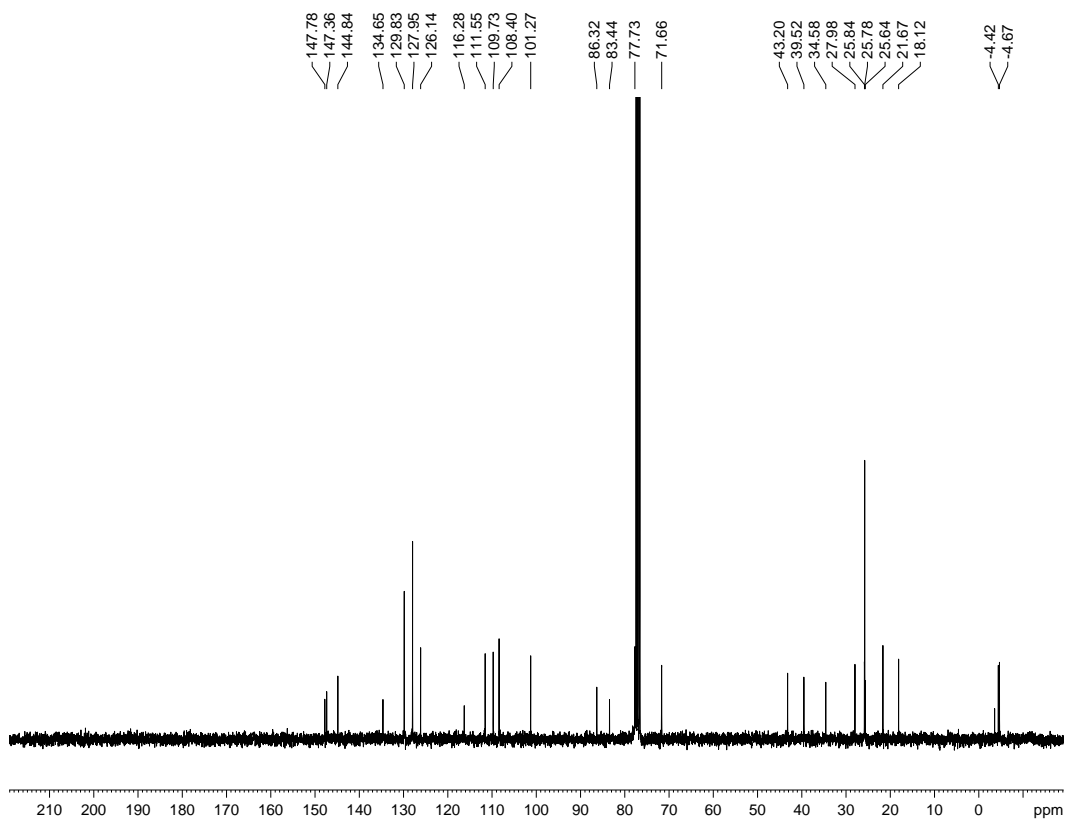

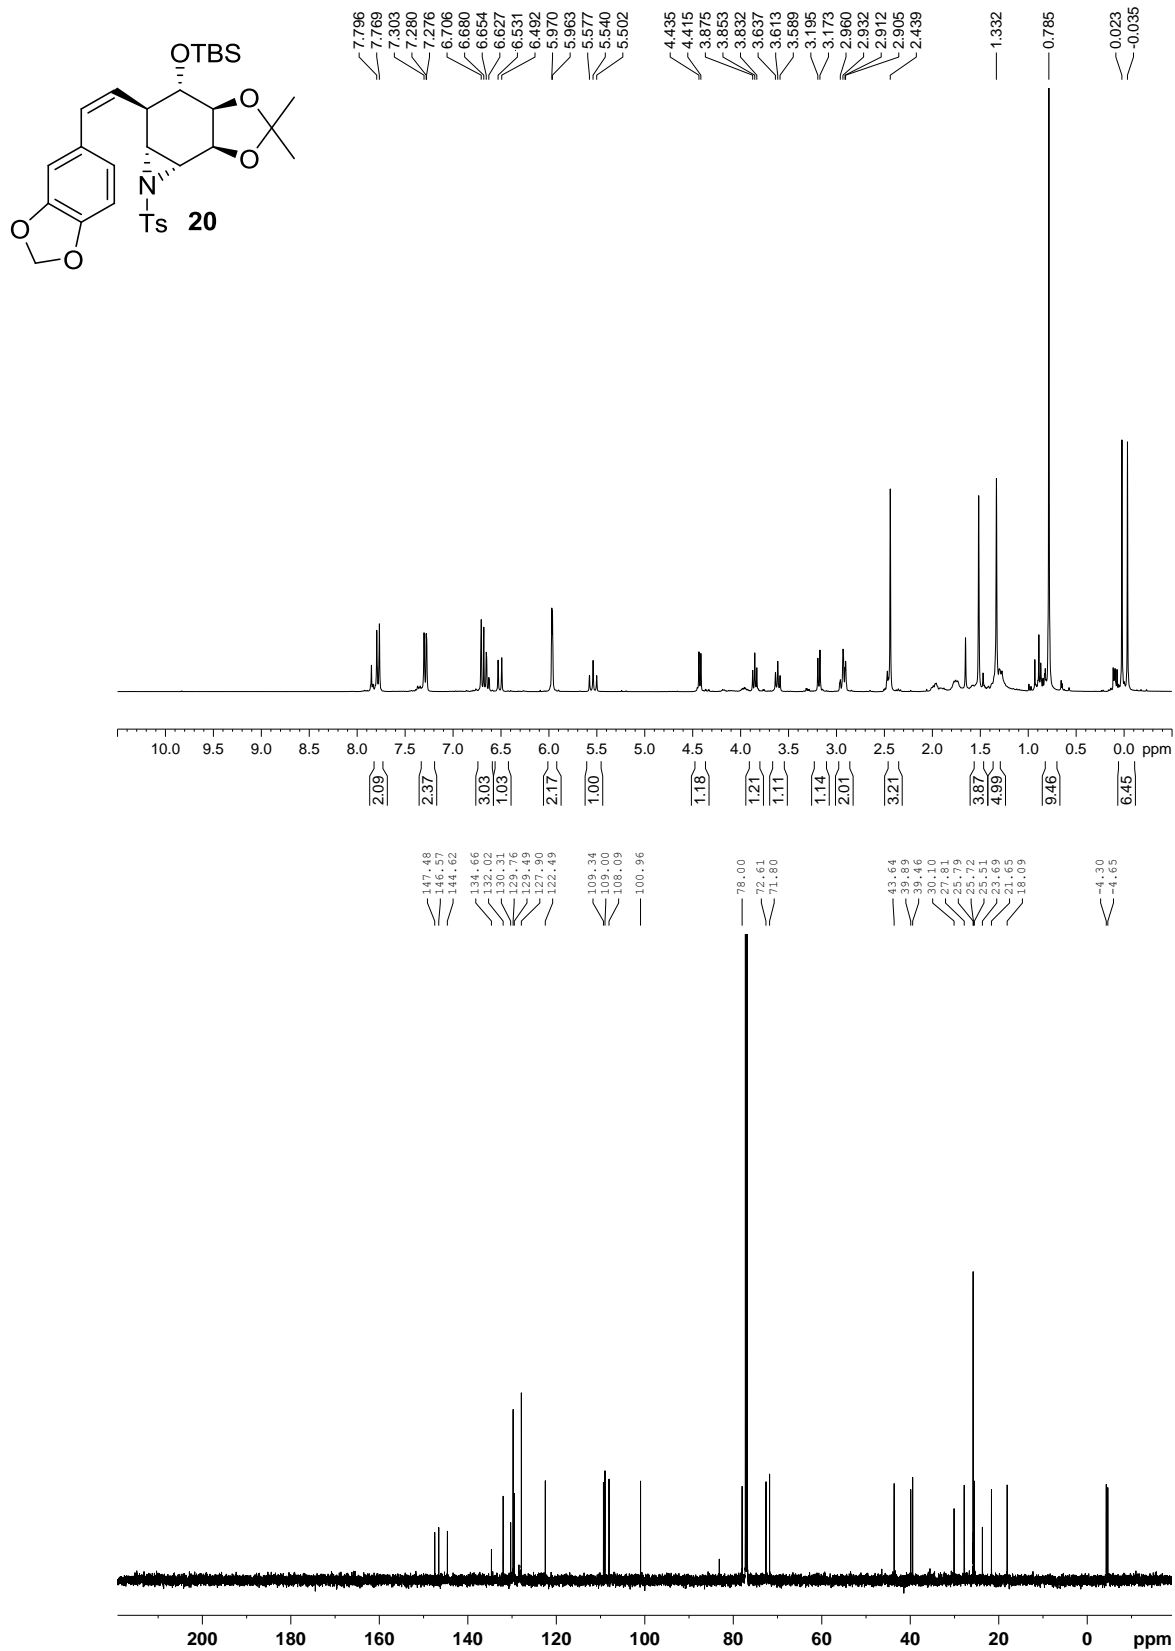

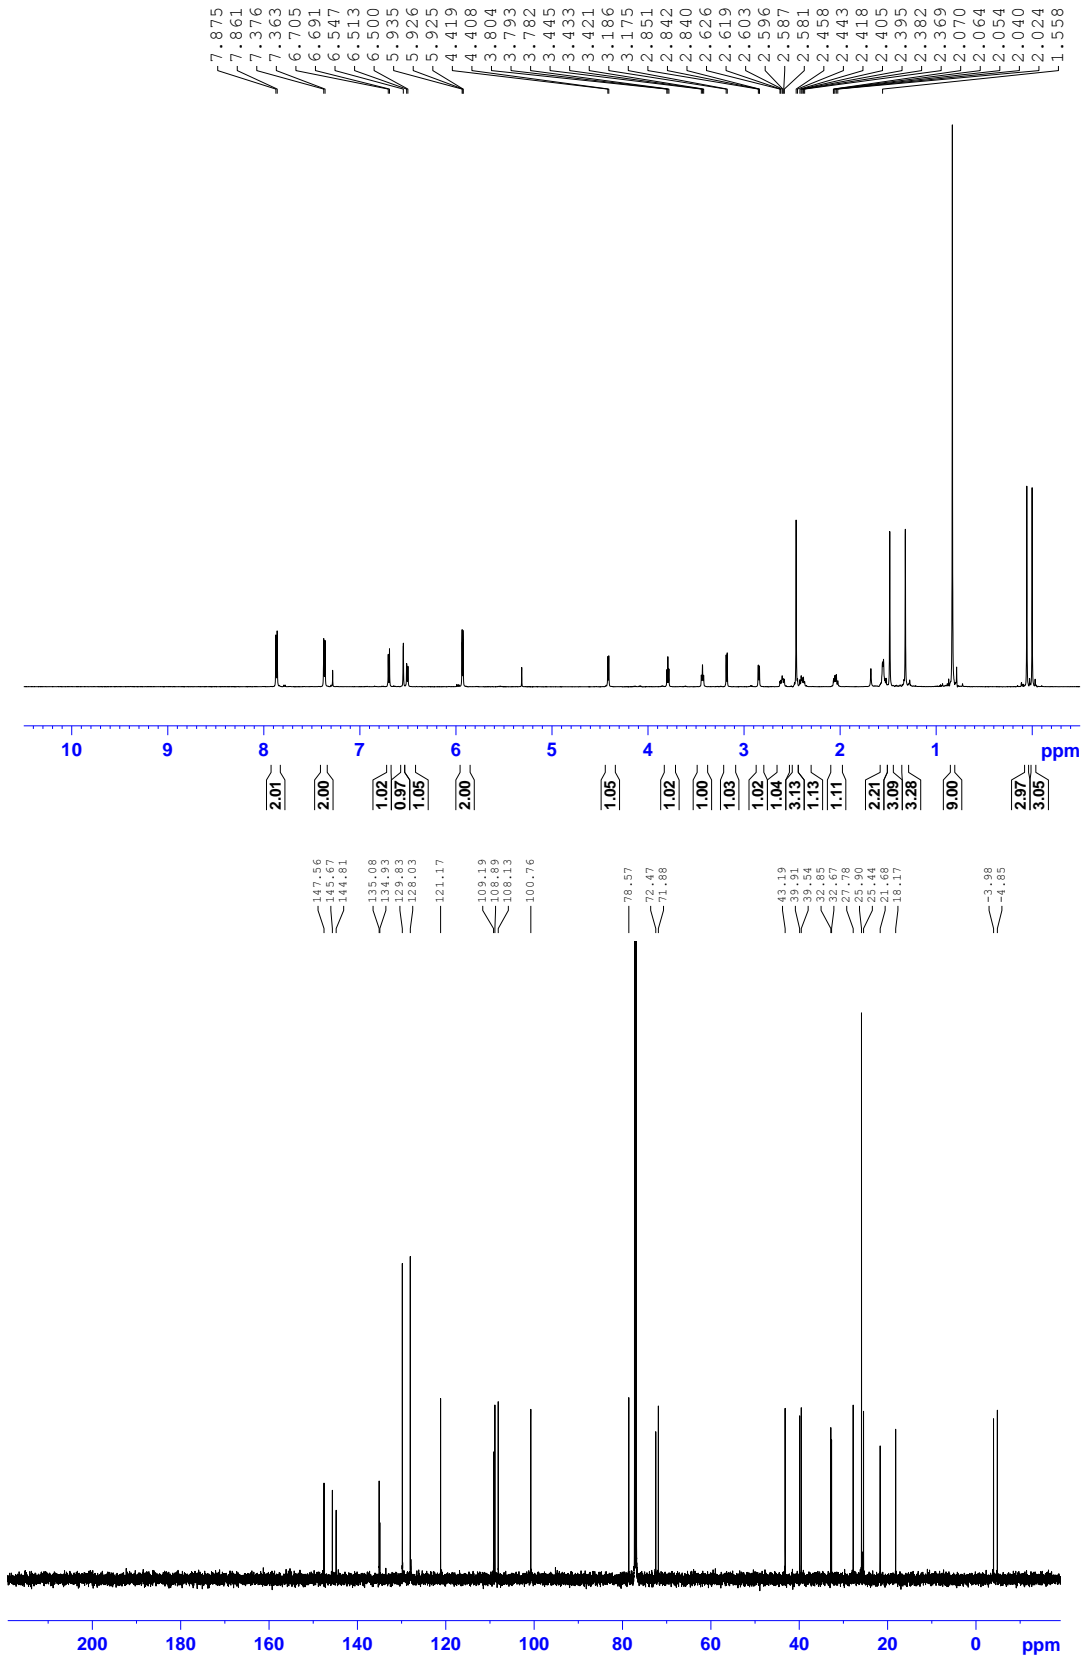

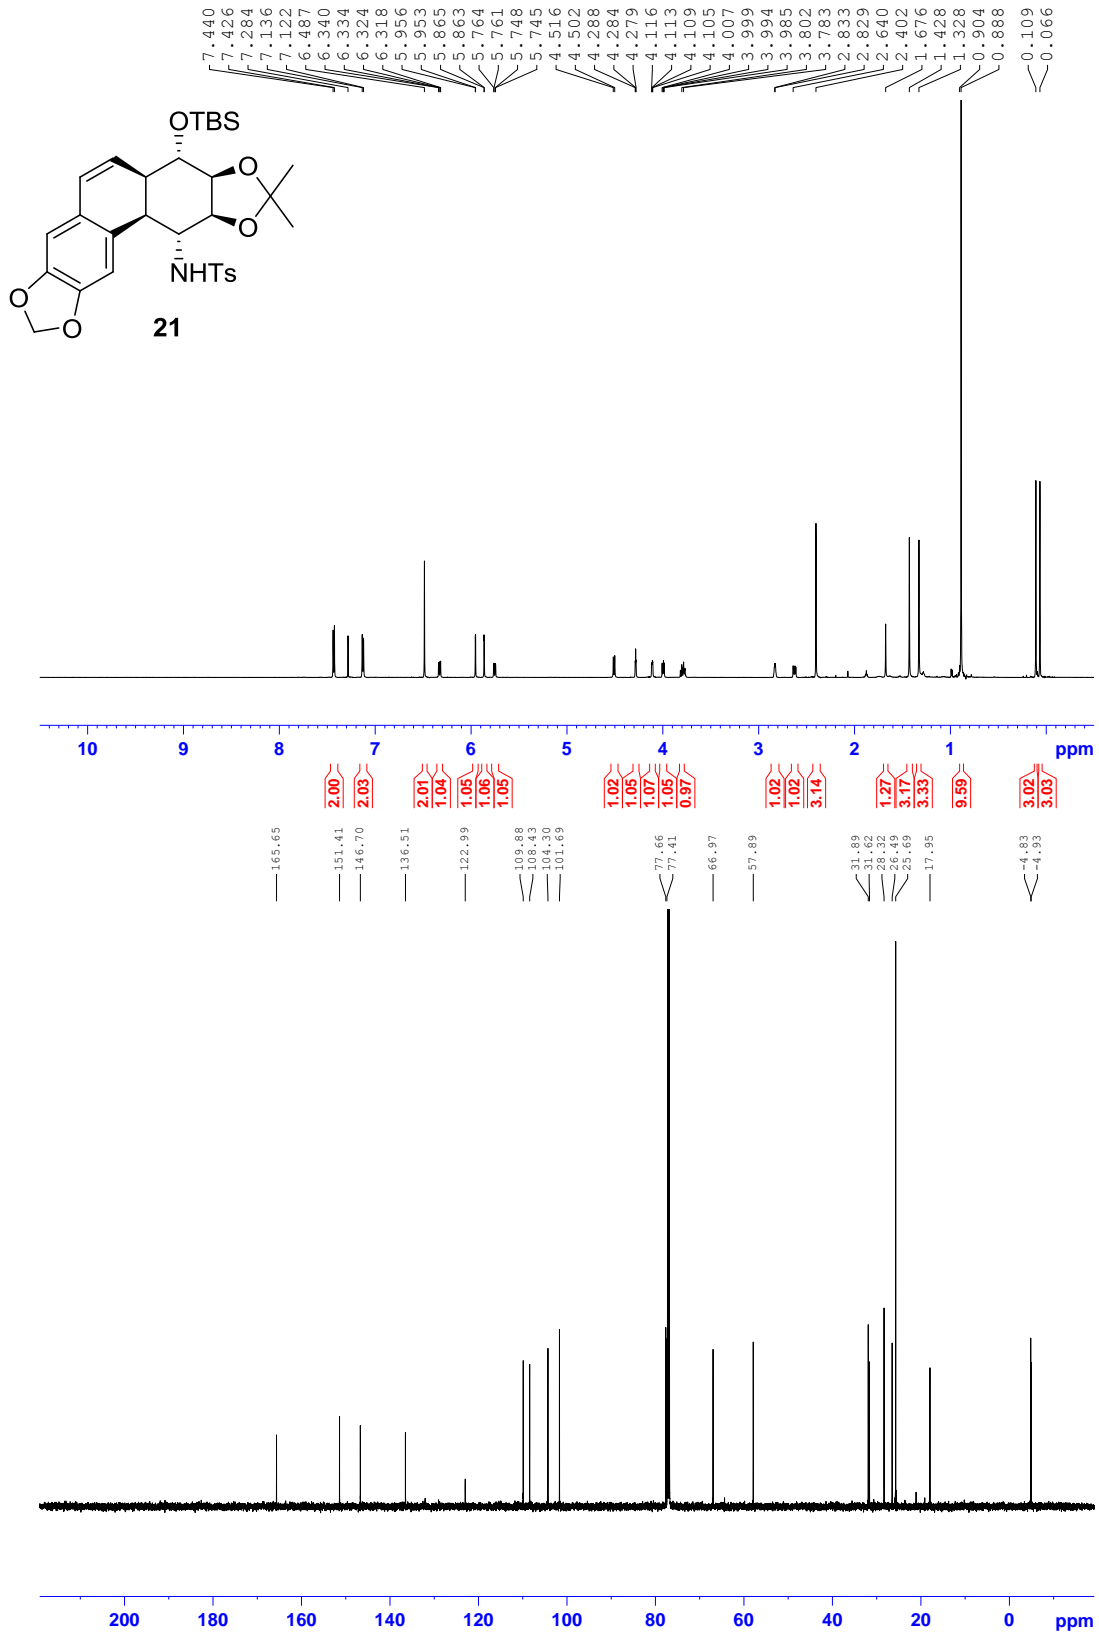



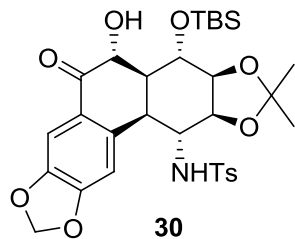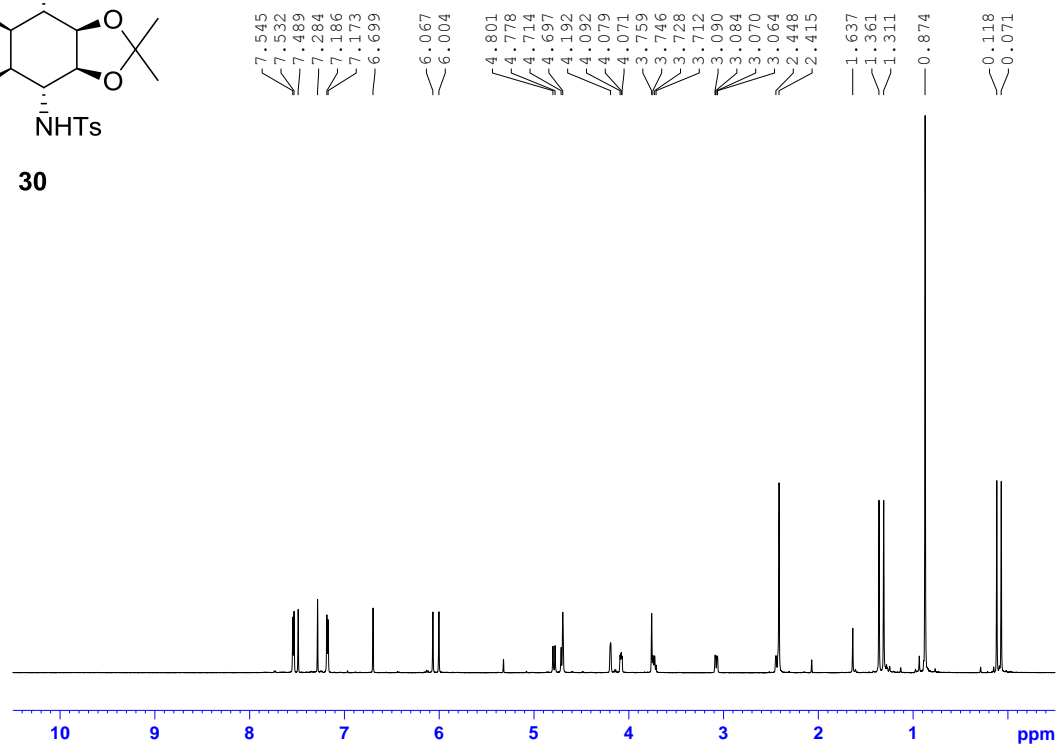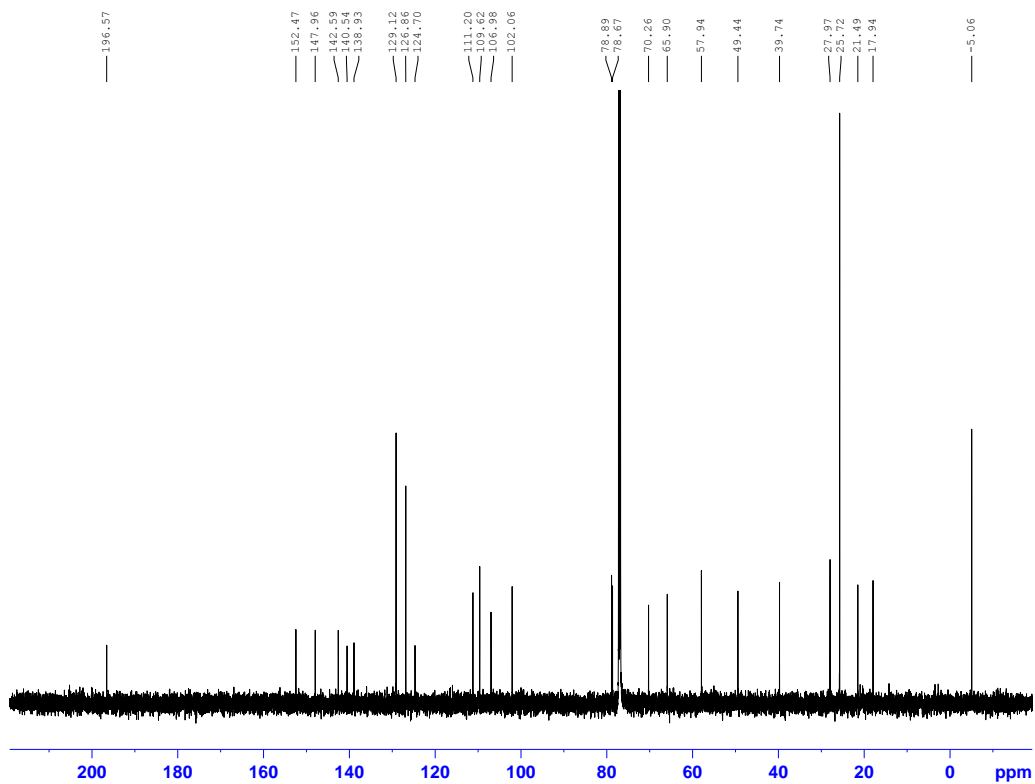

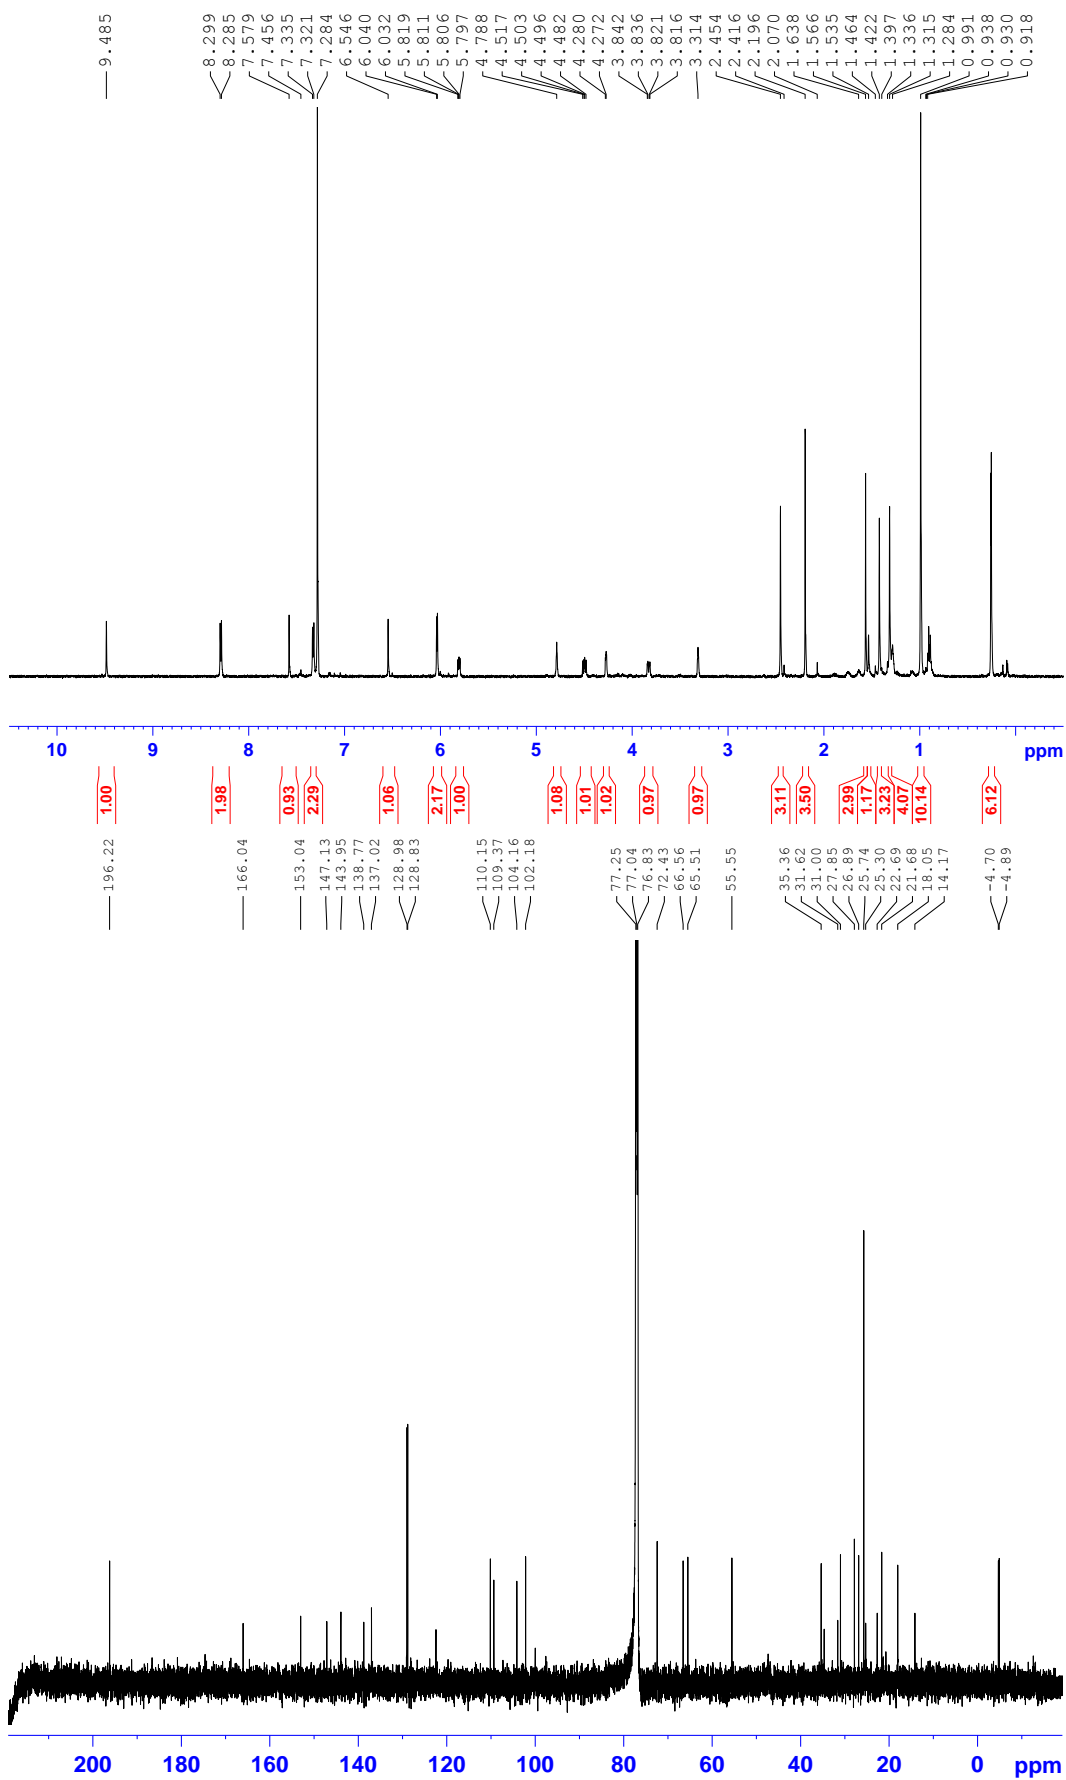

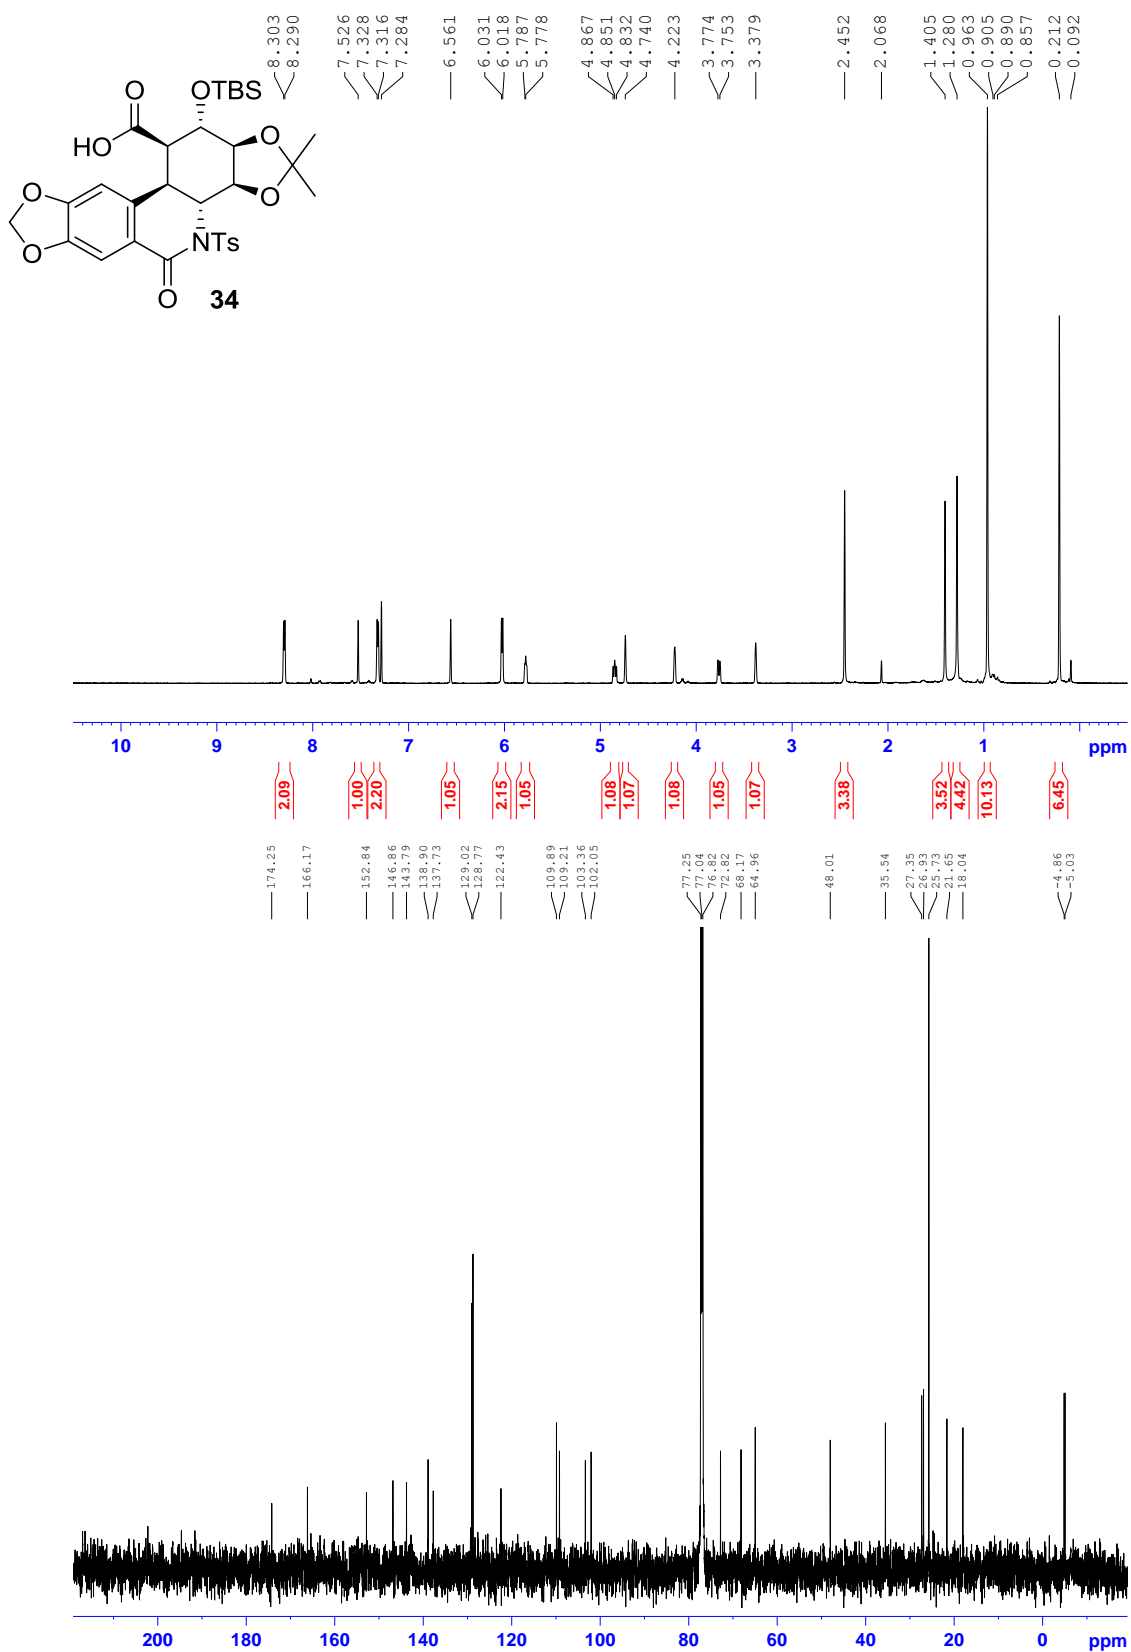

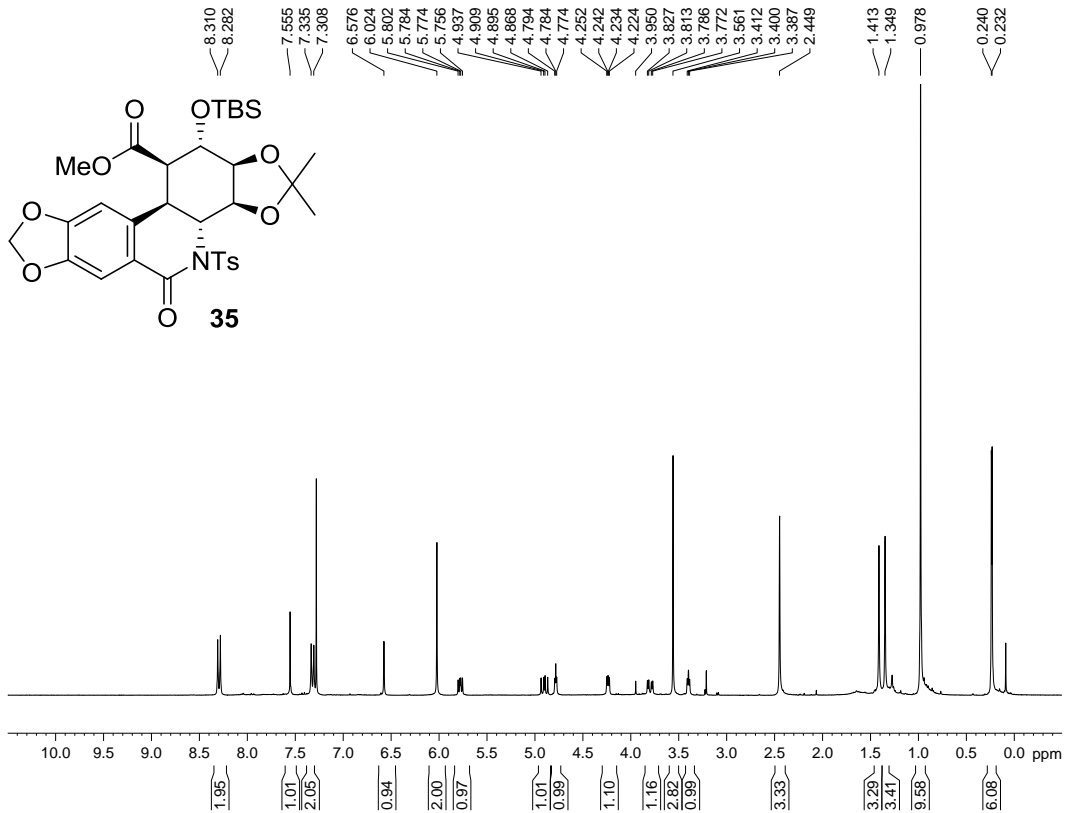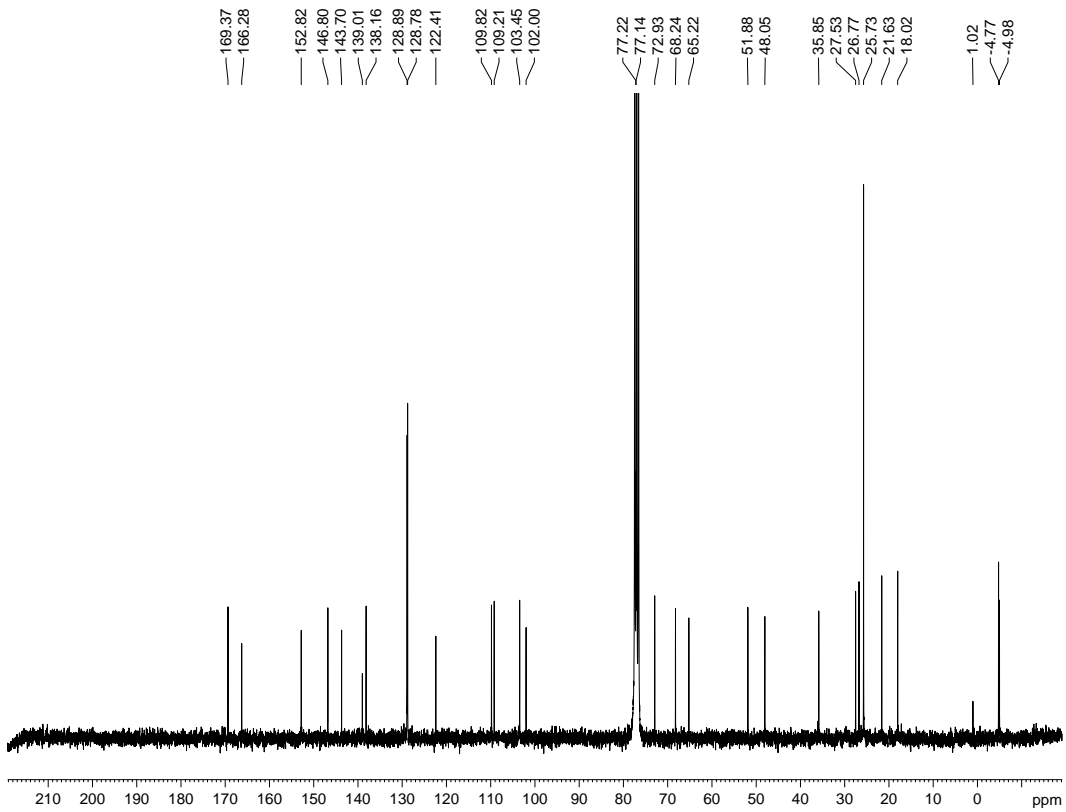

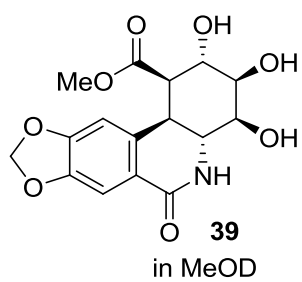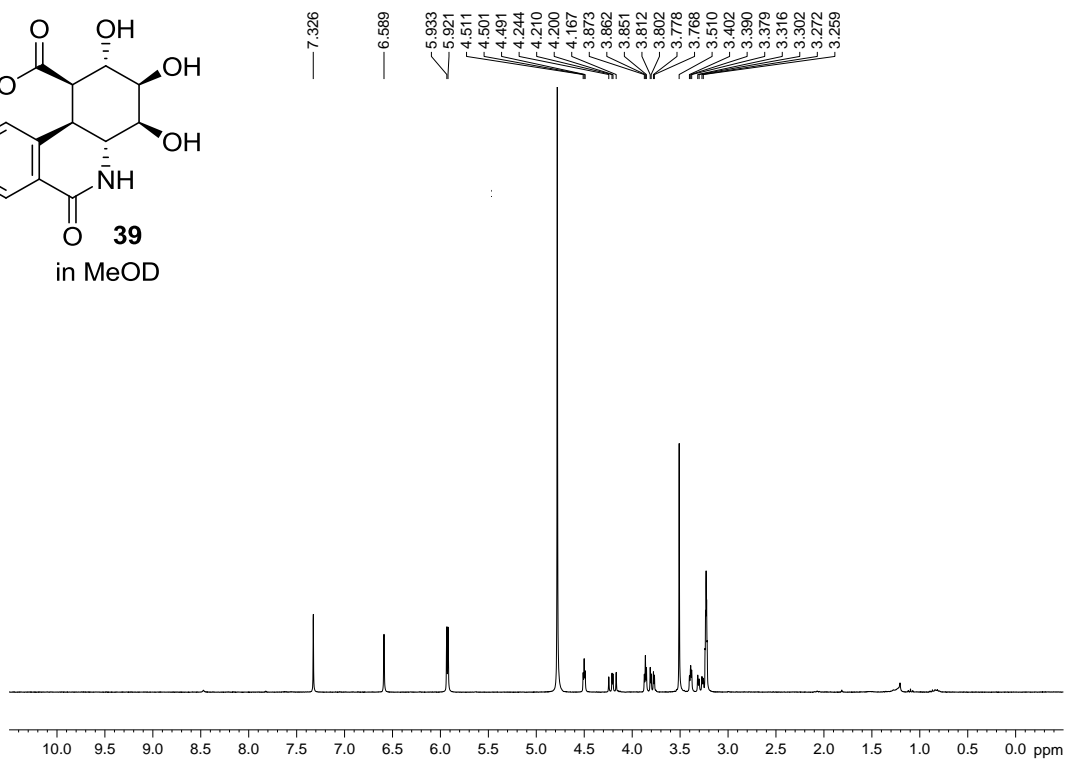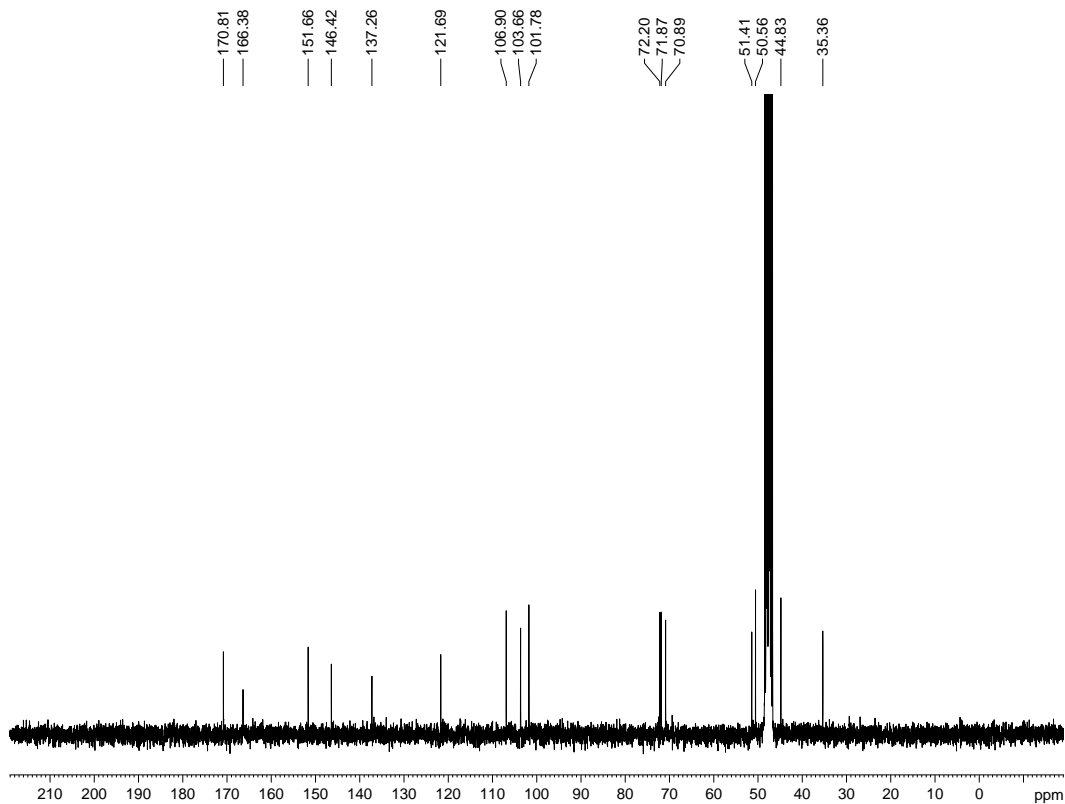

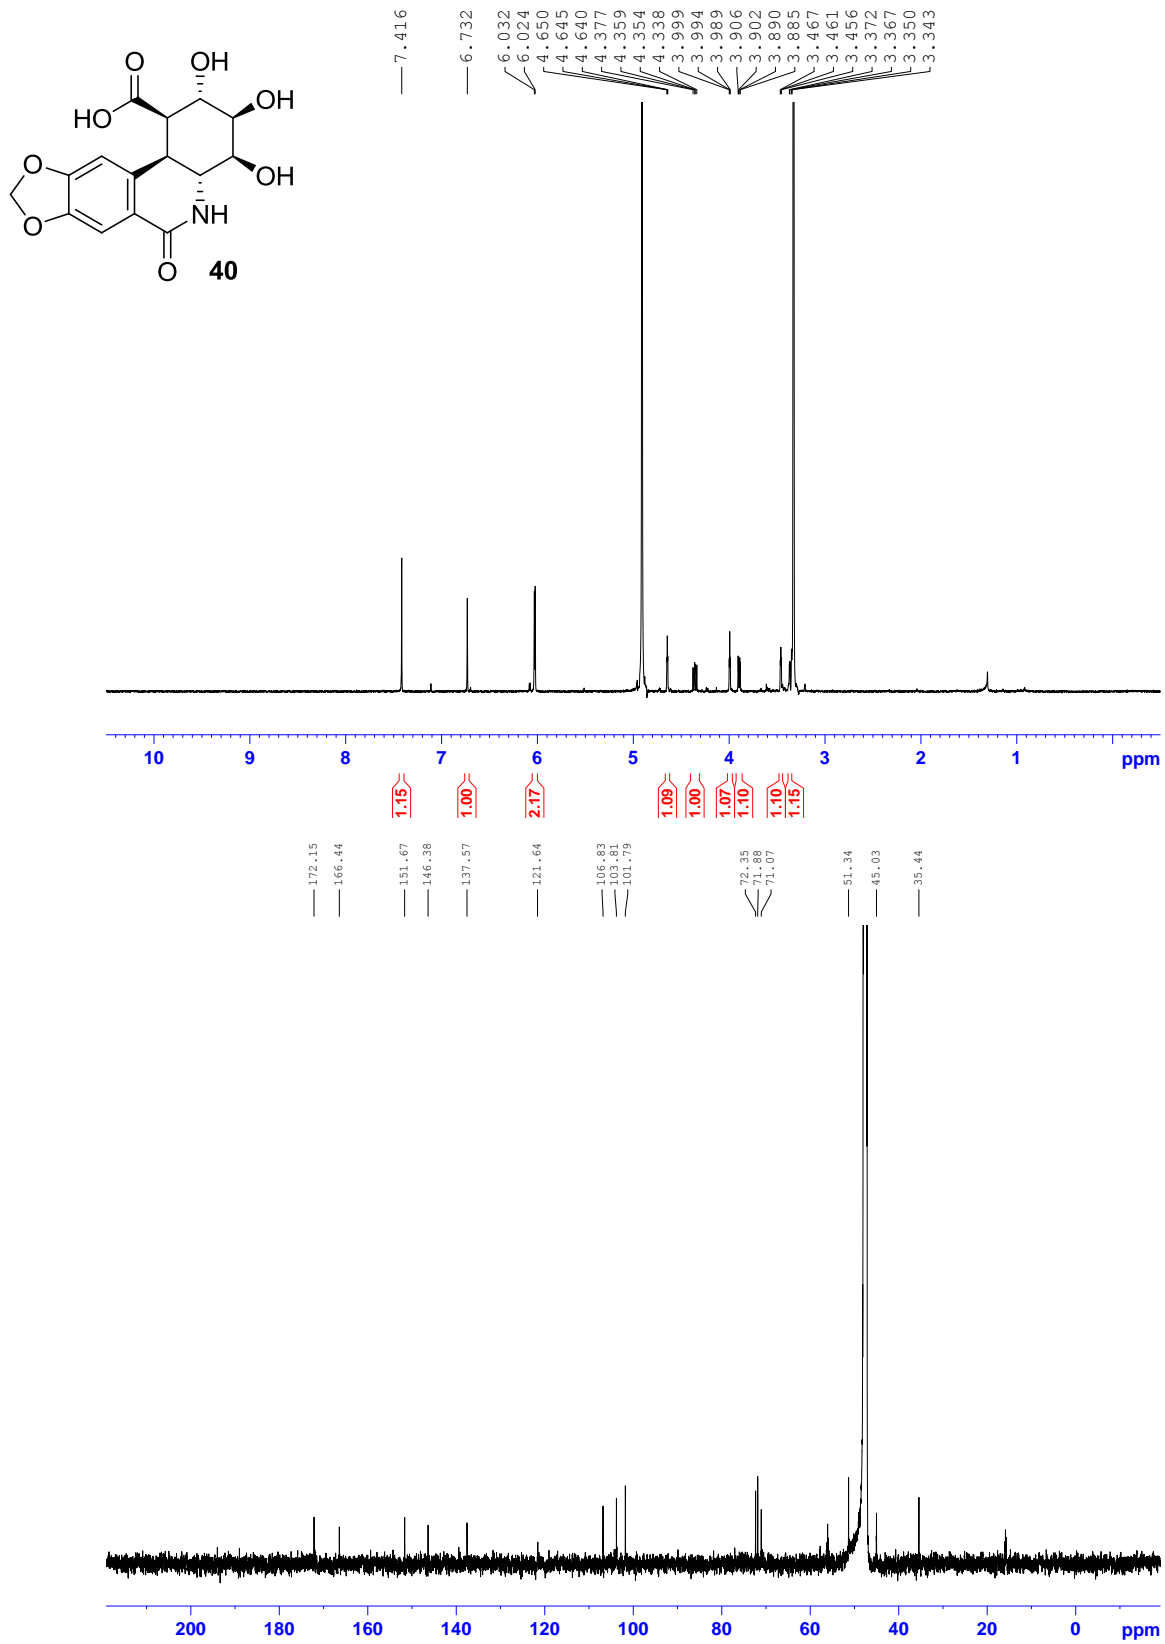

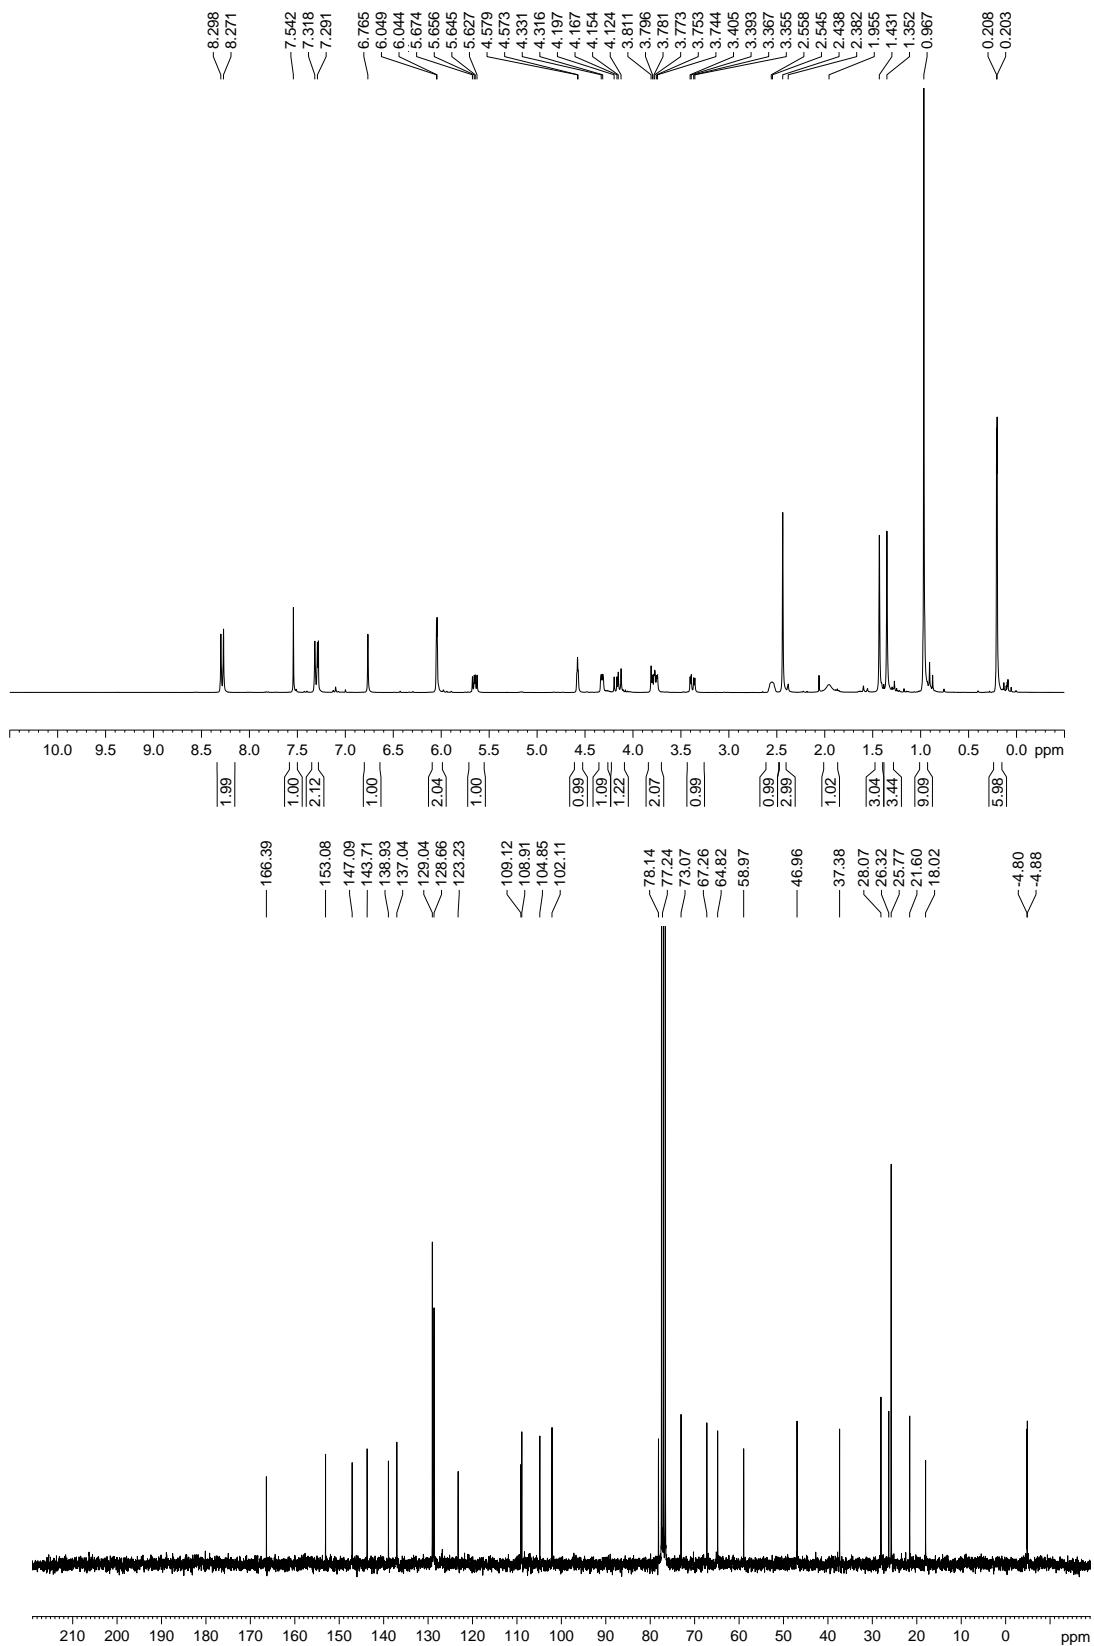

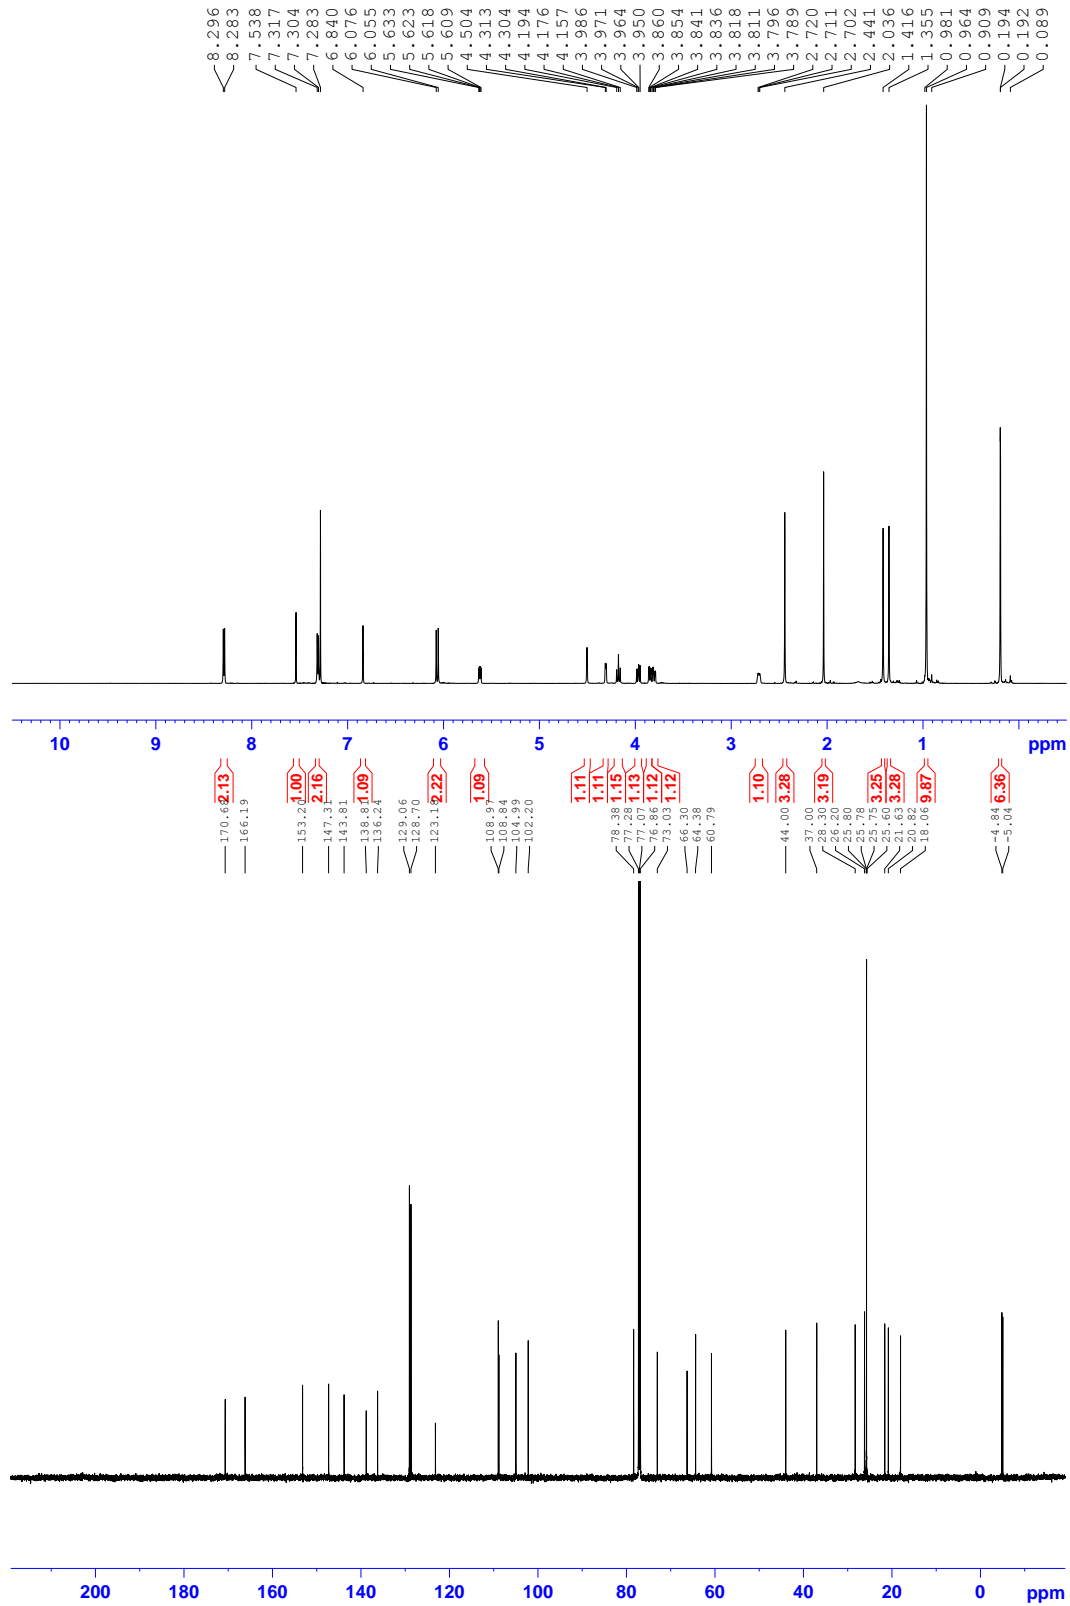



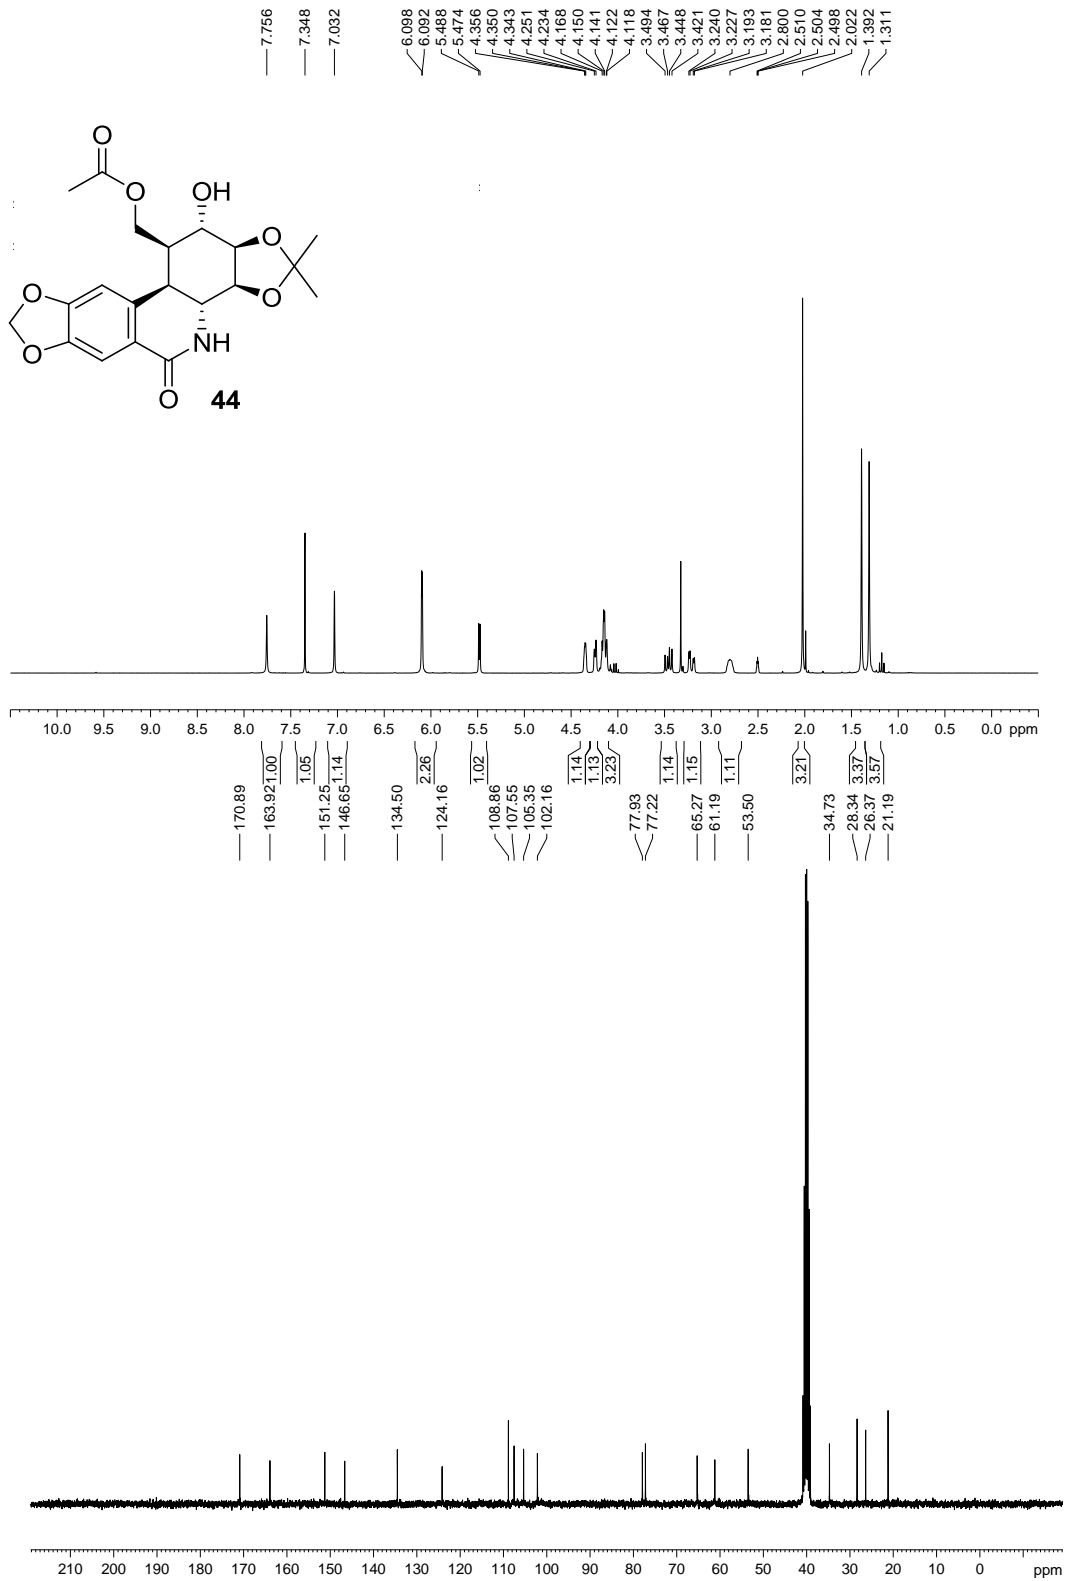

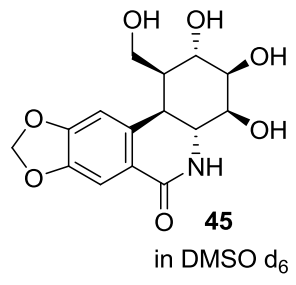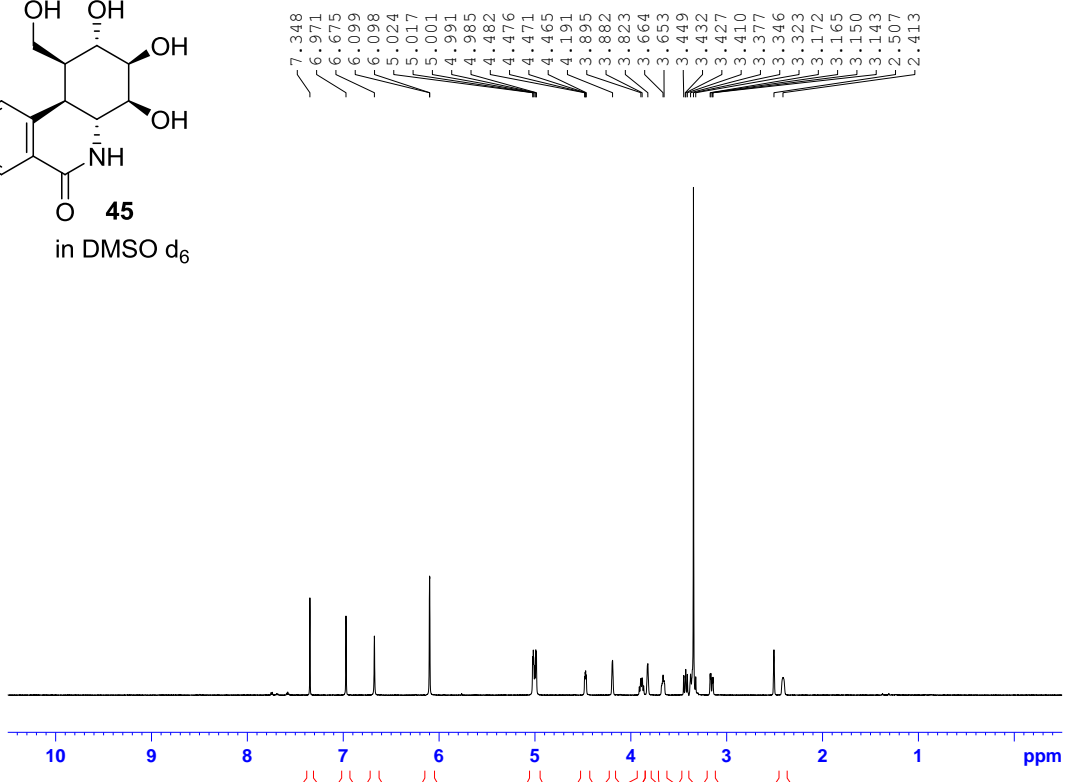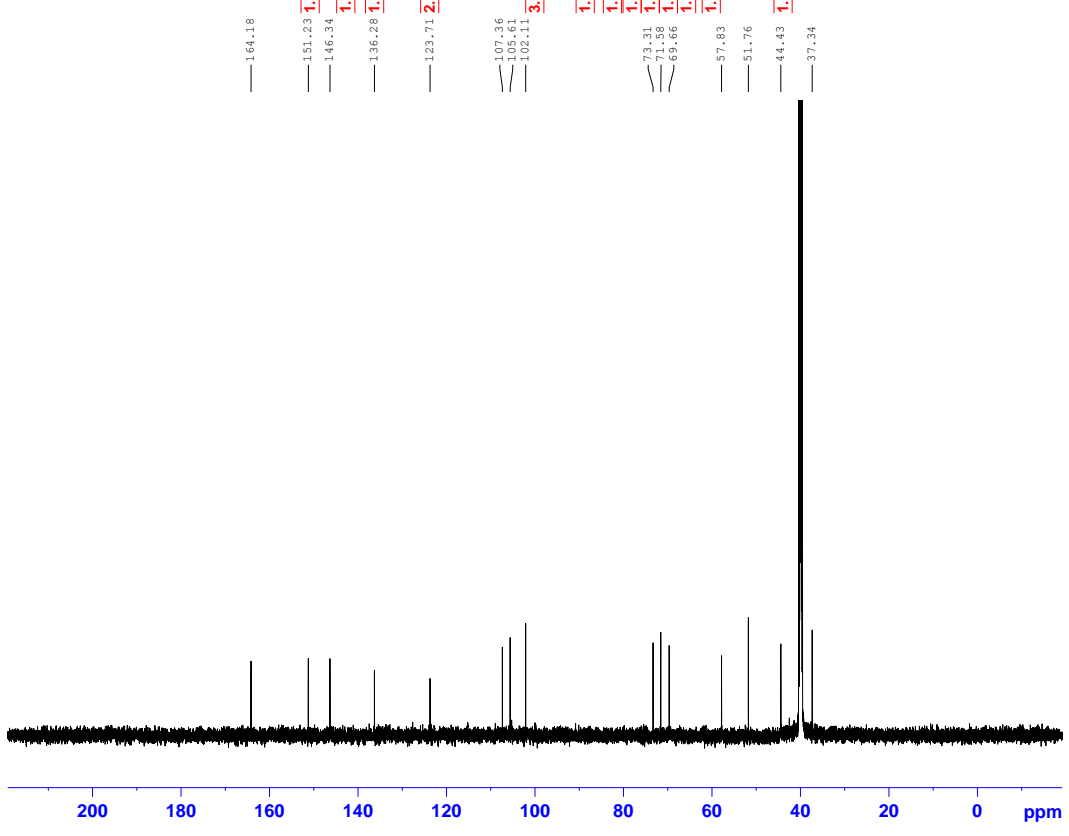

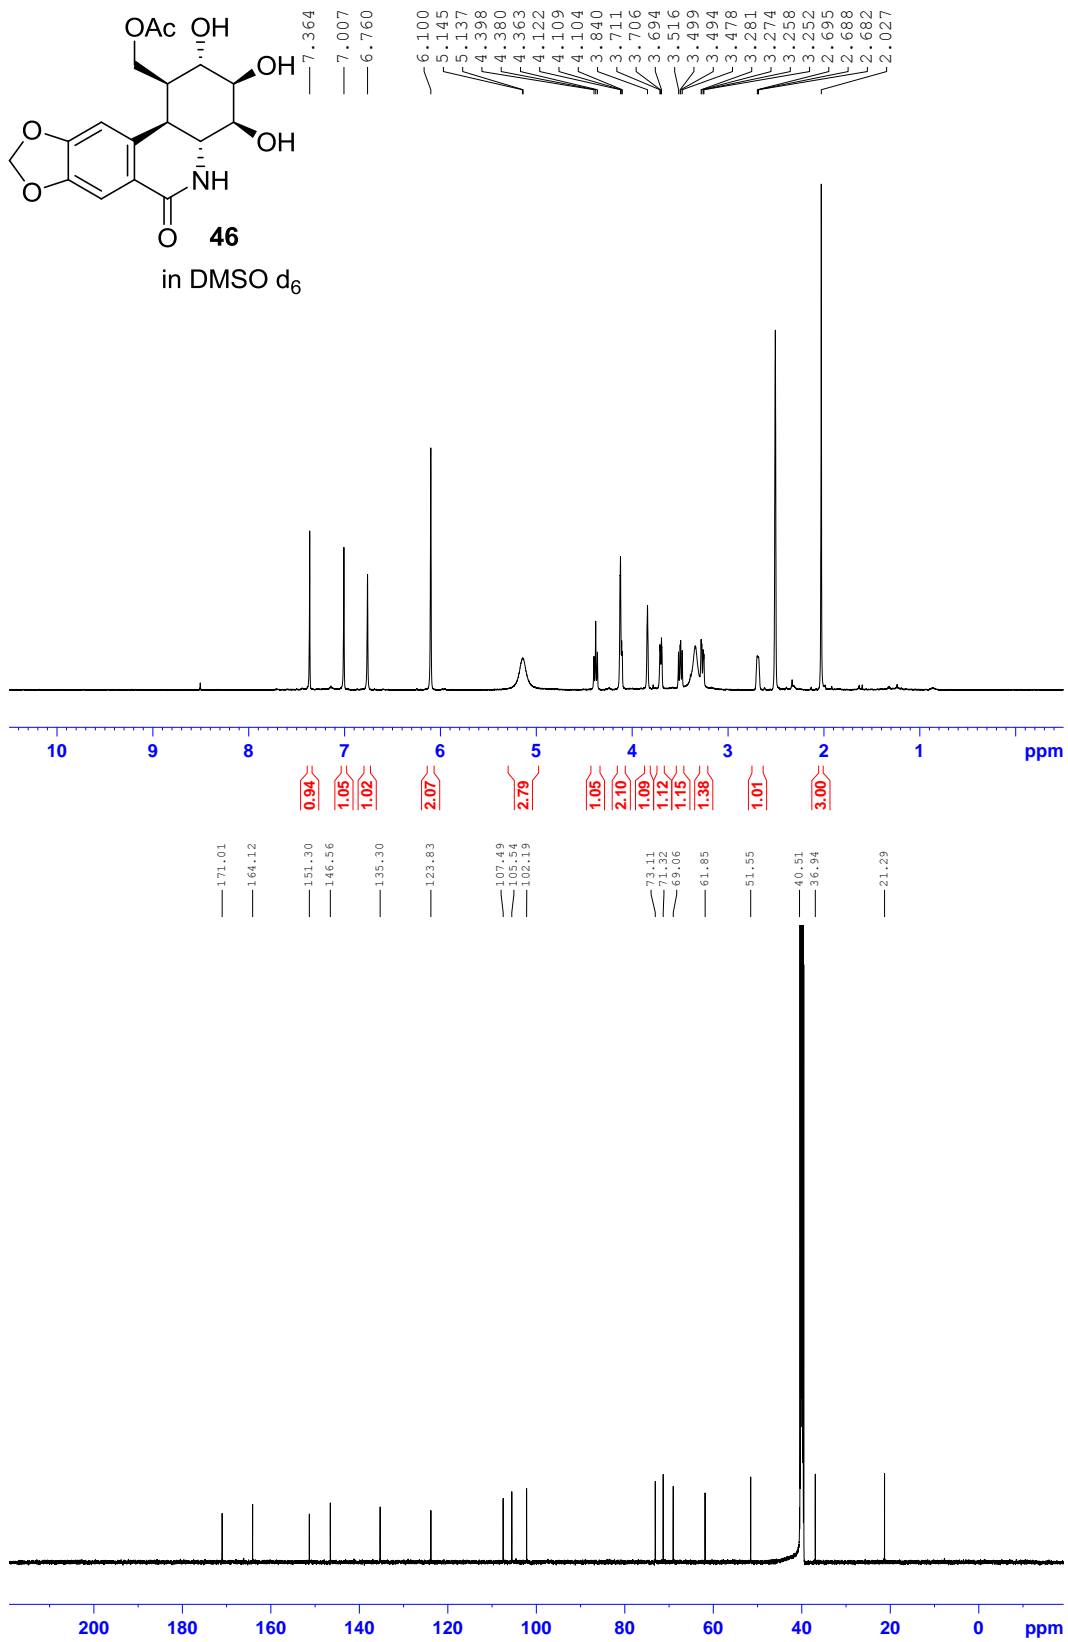

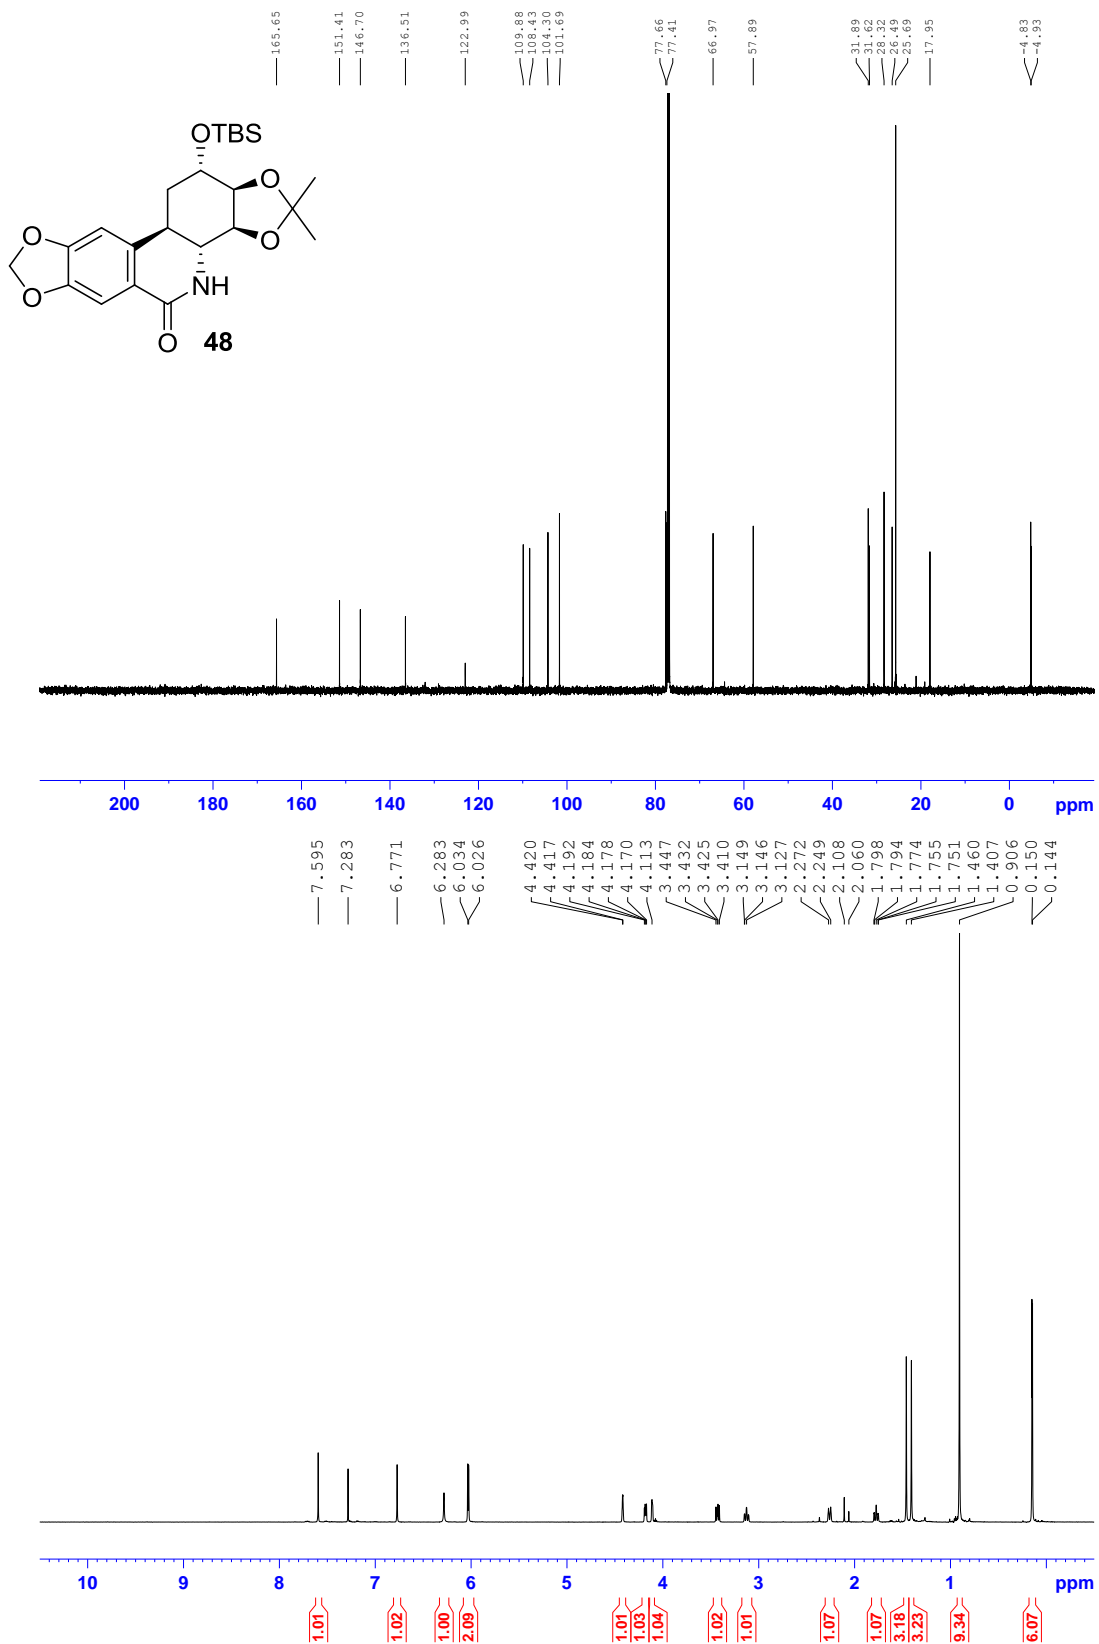

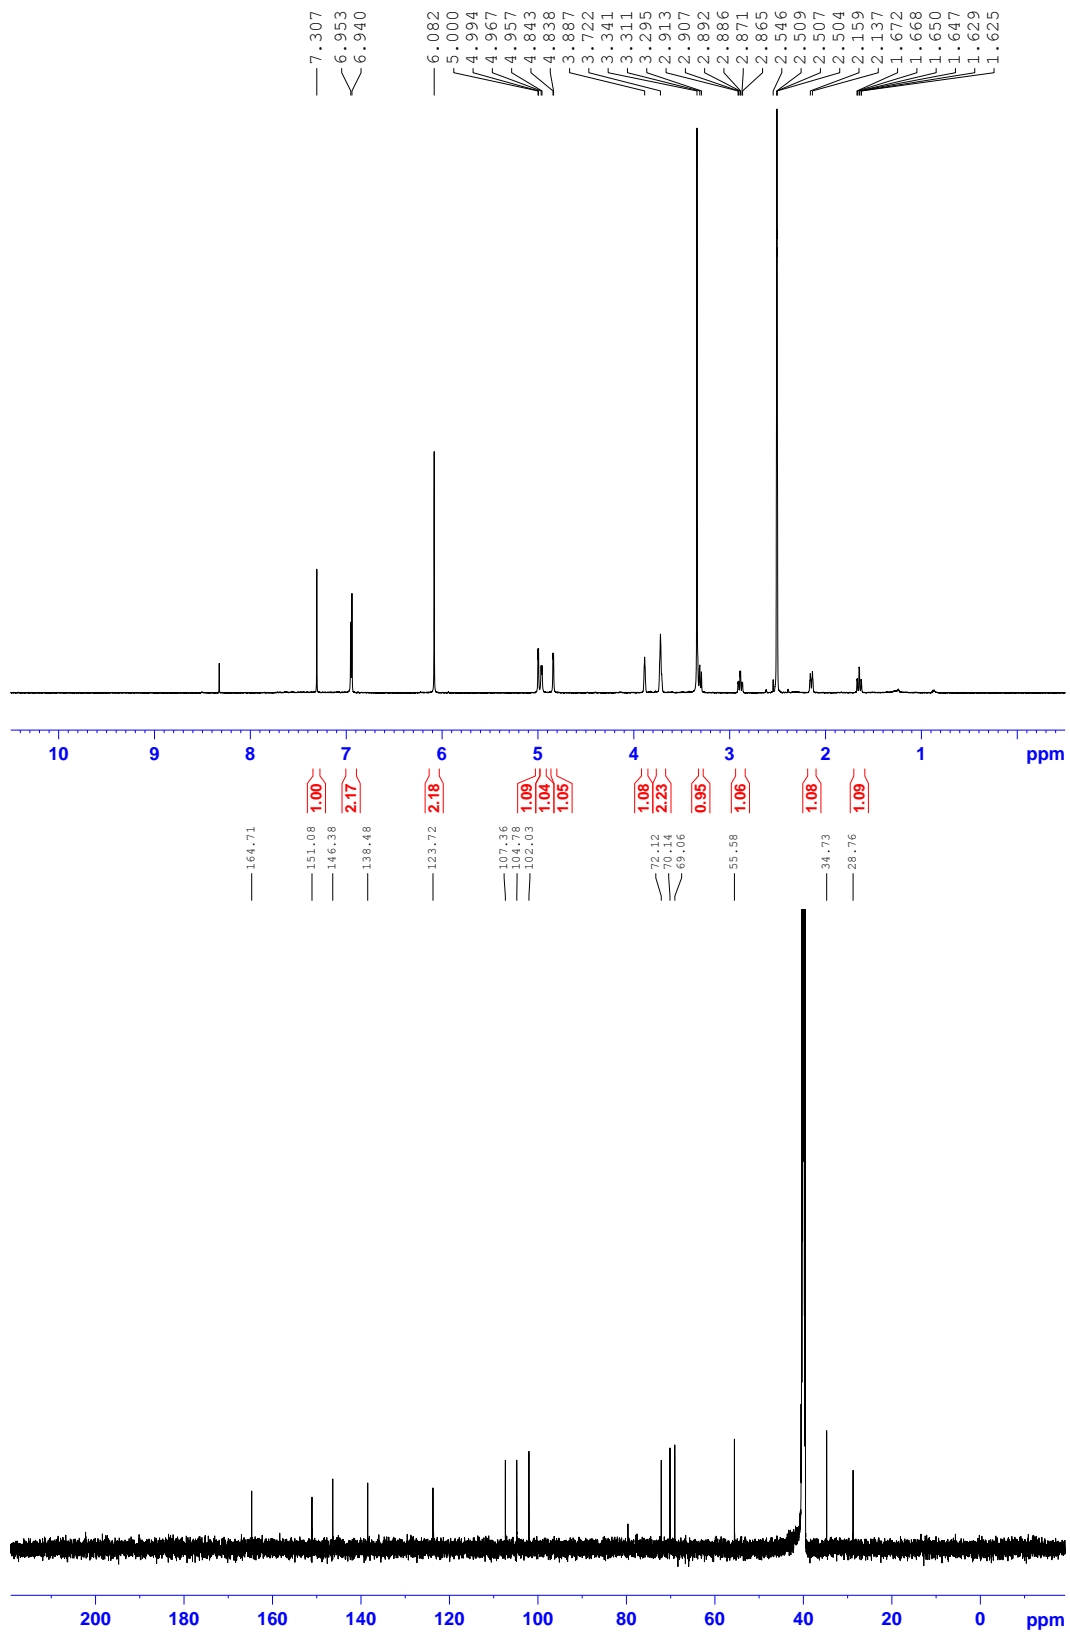

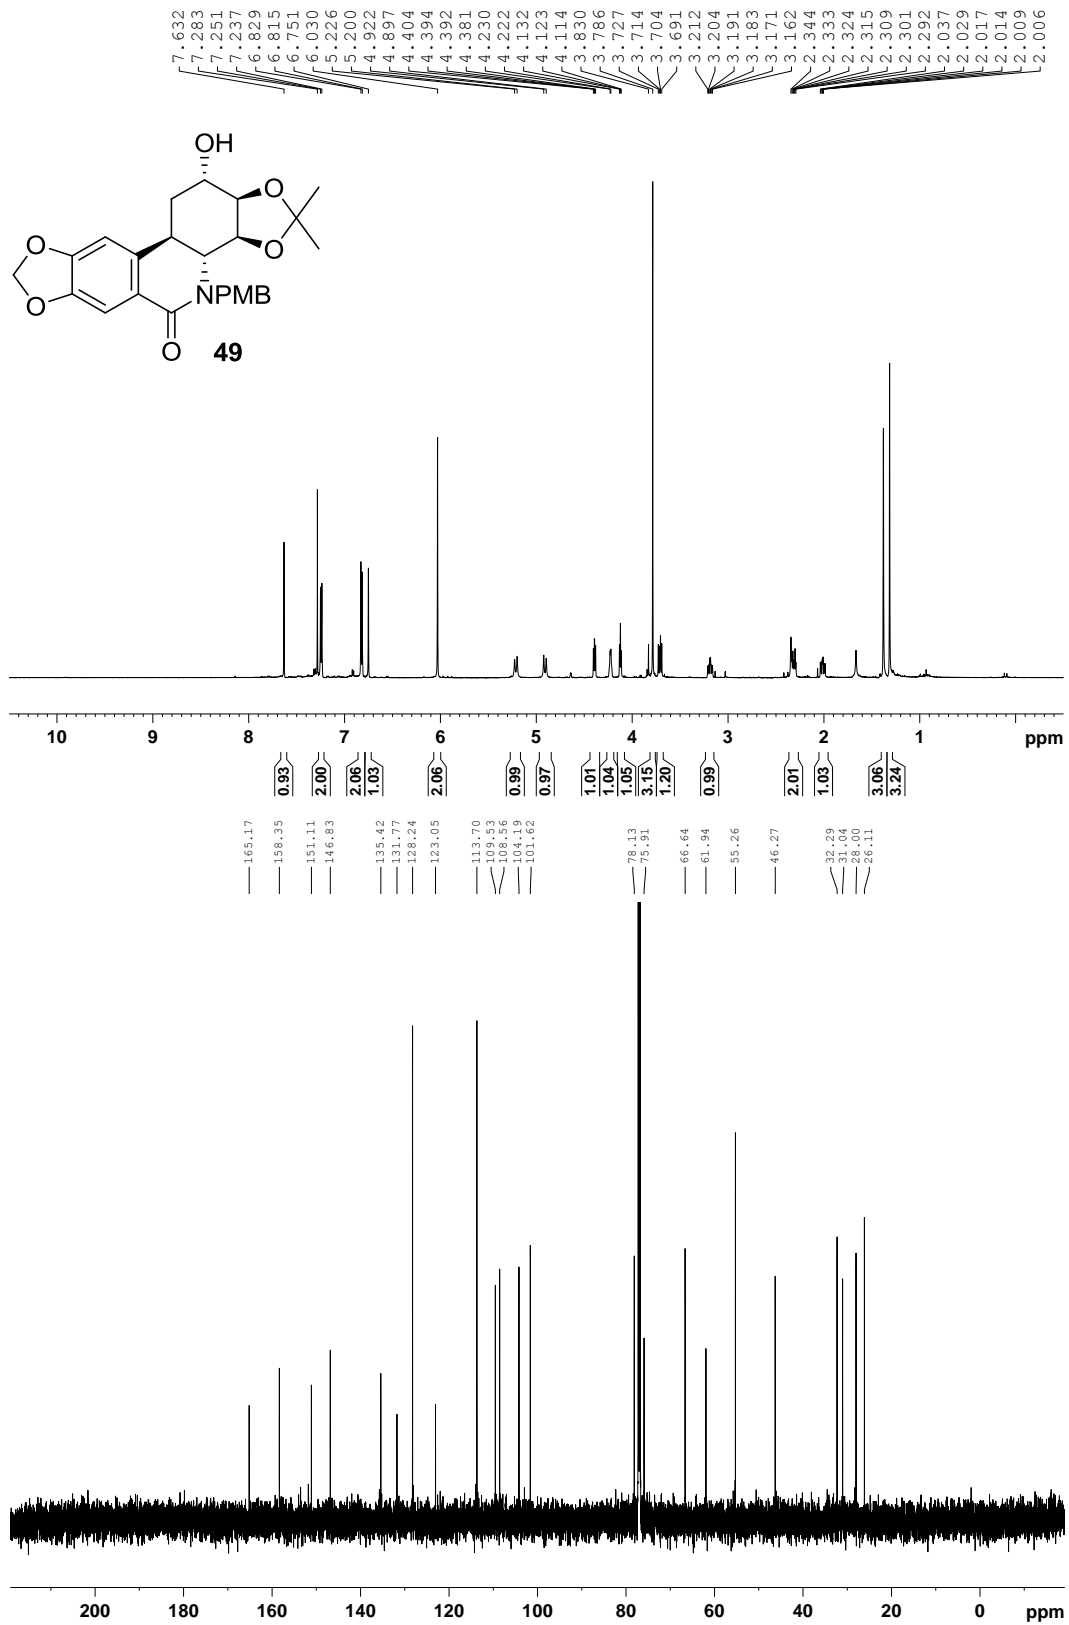

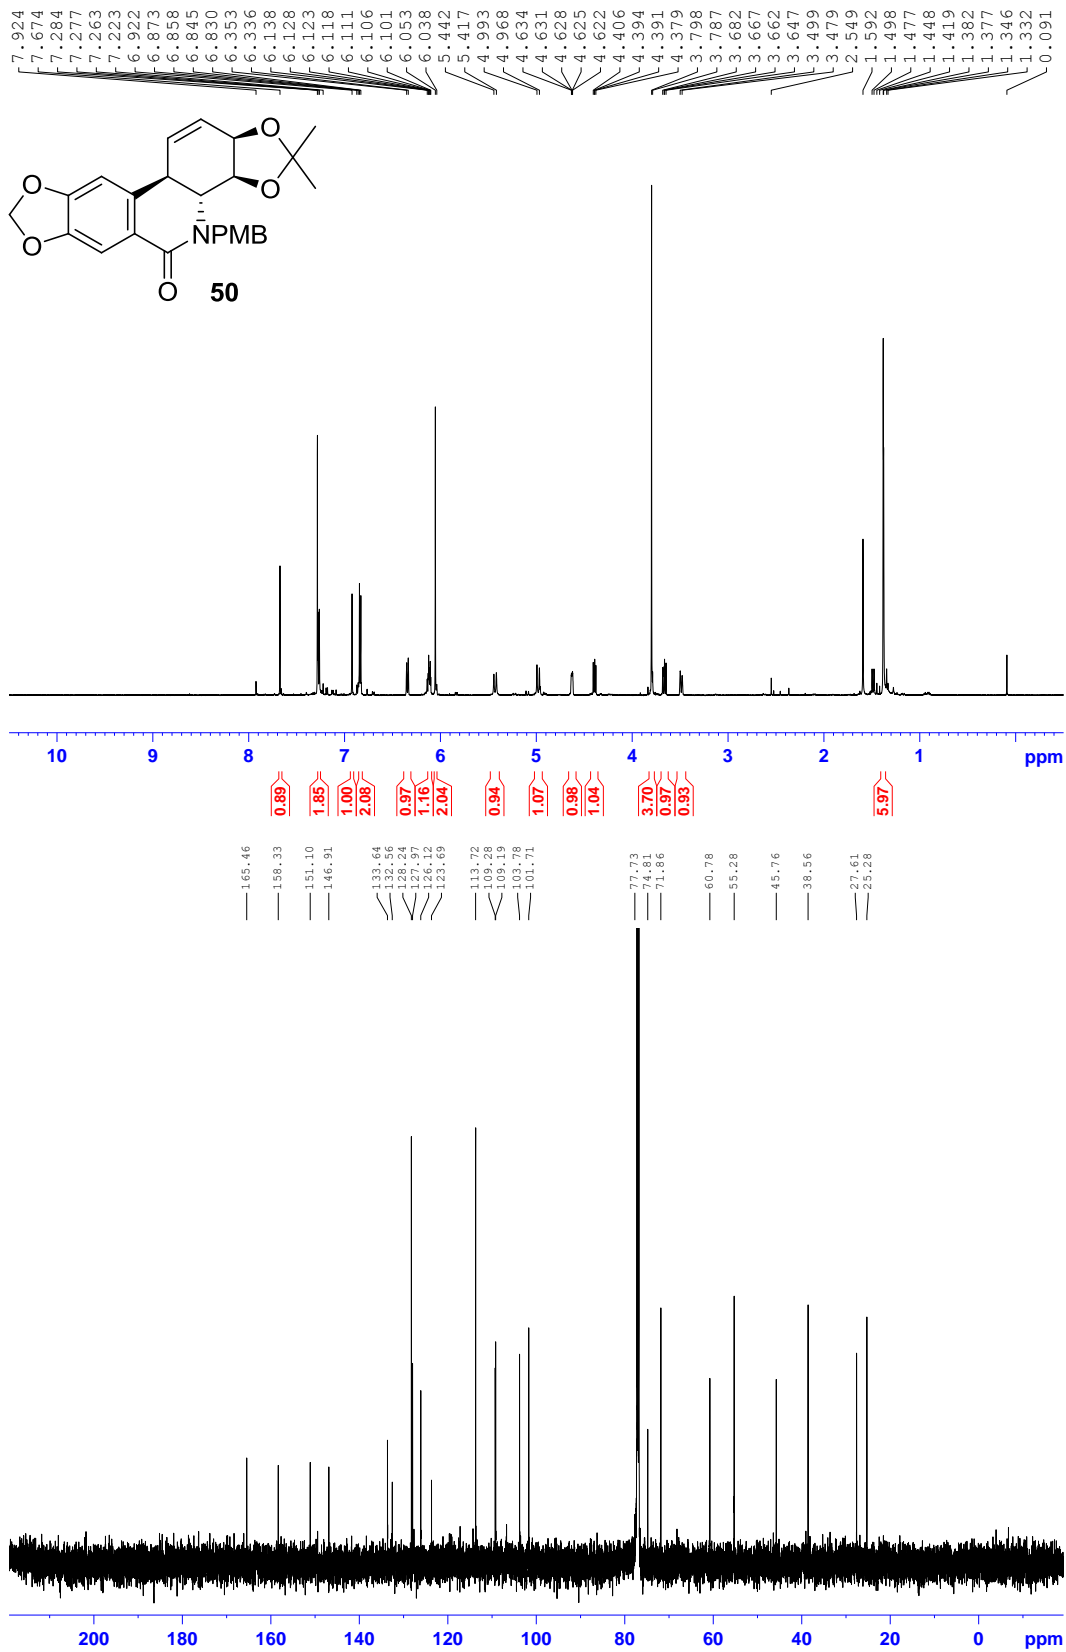

Supplement: NIHMS194663-supplement-1_si_001.pdf [file NIHMS194663-supplement-1_si_001.pdf]
